# Supplementary material
Source: publisher figshare collection journal article supplement (https://gsajournals.figshare.com/ndownloader/files/24760403)
Supplement: Supplementary file 1 [file 24760403]

## Sheet: logisticResults ALL
S2. Table of Full Screen Results.
			Raw Data (counts)				Rh3%			Logistic Regression Testing GOF Screen (One Compared to Rest)			Logistic Regression Testing LOF Screen (One Compared to Rest)			Logistic Regression testing Differences in Proportions Between the GOF and LOF Screens (Diff)
chr	EP_line	Gene Name(s)	GOF_Rh4	GOF_Rh3	LOF_Rh4	LOF_Rh3	GOF Rh3%	LOF Rh3%	Difference in Screens (Diff = GOF - LOF) (Rh3%)	WaldChiSq	p-value	FDR	WaldChiSq	p-value	FDR	diffInProp logisticZvalue	diffInProp logisticPvalue	diffInProp logisticFDR
X	P{EP}EP1493[EP1493]	EP1493, Fur2	569	740	671	499	0.565317	0.426496	0.138821	25.7129	3.96171e-07	2.37702e-05	1.2192	0.269517	0.608068	4.41	1.02e-05	0.00488564
X	P{EP}EP1218	Tango13	741	993	754	646	0.572664	0.461429	0.111236	42.0795	8.76388e-11	4.20666e-08	2.06484	0.15073	0.452191	3.42	0.000636854	0.0958284
3	P{EP}CG1249[EP3399]	SmD2	888	593	887	592	0.400405	0.40027	0.000134679	17.9646	2.25055e-05	0.000830971	0.302766	0.582154	0.817058	-3.35	0.00079857	0.0958284
X	P{EP}Gbeta13F[EP1071]	Gbeta13F	955	1035	703	483	0.520101	0.407251	0.112849	5.0725	0.0243	0.253651	5.9094	0.0151	0.131439	3.44	0.0005754	0.0958284
X	P{EP}EP1368	CG32758	708	588	832	469	0.453704	0.360492	0.0932118	8.89359	0.00286173	0.0427494	35.4971	2.55427e-09	6.13025e-07	2.33	0.0197279	0.644902
X	P{EP}EP334	CG14408	485	653	572	555	0.573814	0.492458	0.0813559	28.2828	1.04821e-07	1.00628e-05	11.6393	0.000645721	0.0129144	1.51	0.132037	0.83751
X	P{EP}EP1547	EP1547, hang	858	642	893	607	0.428	0.404667	0.0233333	27.1782	1.85535e-07	1.27224e-05	8.79804	0.00301554	0.0452331	-1.41	0.159395	0.858007
2	P{EP}Sin3A[EP2387]	CR30055, Sin3A	281	329	731	585	0.539344	0.444529	0.0948154	22.2268	2.42274e-06	9.69097e-05	21.015	4.55702e-06	0.000243041	1.39	0.165001	0.858007
2	P{EP}EP1162	lov	458	502	649	507	0.522917	0.438581	0.0843354	24.1288	9.01022e-07	4.32491e-05	15.0384	0.000105345	0.00281947	1.08	0.280029	0.903524
X	P{EP}EP491	Gmap	405	492	909	827	0.548495	0.476382	0.0721125	10.2321	0.00138021	0.0264999	8.2652	0.00404121	0.0538829	1.08	0.281784	0.903524
3	P{EP}CG8602[EP3102]	CG8602	495	533	680	532	0.518482	0.438944	0.0795386	17.0296	3.68022e-05	0.00126179	10.6451	0.00110365	0.0196205	0.79	0.429431	0.979267
X	P{EP}CG14217[EP1455]	Tao	774	544	876	536	0.412747	0.379603	0.0331432	35.8103	2.17497e-09	5.21992e-07	22.7792	1.81727e-06	0.000174458	-0.79	0.430979	0.979267
2	P{EP}EP937	sli	1003	1029	513	432	0.506398	0.457143	0.0492548	32.3876	1.26287e-08	2.02059e-06	21.8212	2.99268e-06	0.000202404	-0.59	0.555968	0.979267
X	P{EP}EP1451	CG1806	500	372	1088	688	0.426606	0.387387	0.0392181	16.3679	5.21599e-05	0.00166912	22.0927	2.59803e-06	0.000202404	-0.45	0.65358	0.979267
3	P{EP}CG10420[EP762]	CG10420	658	666	847	644	0.503021	0.431925	0.0710963	12.6134	0.000382988	0.00875401	9.40563	0.0021632	0.0334947	0.45	0.654598	0.979267
X	P{EP}Pvf1[EP1624]	Pvf1	823	658	770	489	0.444294	0.388403	0.0558909	15.2813	9.26284e-05	0.00261539	15.0315	0.00010573	0.00281947	0.38	0.700663	0.979267
X	P{EP}EP912[EP912]	CG32699, EP912	519	623	804	768	0.545534	0.48855	0.0569845	11.6613	0.000638142	0.0139231	13.836	0.000199475	0.00455943	0.36	0.718064	0.979267
X	P{EP}EP1398	CG17896	365	262	543	330	0.417863	0.378007	0.039856	14.9089	0.000112827	0.00300871	14.7414	0.000123307	0.00311512	-0.32	0.751581	0.983145
X	P{EP}EP1625	CG4928	448	564	466	468	0.557312	0.501071	0.0562416	15.6261	7.71819e-05	0.00231546	13.0106	0.000309737	0.00675789	0.28	0.777937	0.992798
2	P{EP}EP511	ex	764	713	774	556	0.482735	0.418045	0.0646902	9.11019	0.0025419	0.040399	6.86196	0.00880497	0.0895309	0.23	0.815367	0.99905
X	P{EP}EP1388[EP1388]	EP1388	634	459	703	424	0.419945	0.37622	0.0437251	24.7189	6.63294e-07	3.53757e-05	20.1317	7.22868e-06	0.000289147	-0.2	0.838624	0.99905
X	P{EP}CG7326[EP1133]	CG7326	383	470	714	707	0.550996	0.497537	0.0534595	10.6478	0.00110201	0.0220401	17.5524	2.79502e-05	0.000838505	0.16	0.869807	0.999905
X	P{EP}peb[EP55]	peb	415	325	699	453	0.439189	0.393229	0.04596	9.16597	0.00246557	0.040399	11.4094	0.000730738	0.0140302	-0.12	0.908326	0.999905
X	P{EP}CG1583[EP1516]	GIIIspla2, Traf6	599	415	821	470	0.40927	0.364059	0.0452113	29.822	4.73593e-08	5.68312e-06	32.253	1.35346e-08	2.16553e-06	-0.11	0.912233	0.999905
3	P{EP}EP983	CG2135	768	736	1108	822	0.489362	0.425907	0.063455	7.3542	0.00669065	0.0892086	8.71275	0.00315992	0.0459624	0.06	0.955435	0.999905
2	P{EP}CG8828[EP2492]	dgt5	452	465	682	409	0.507088	0.374885	0.132203	14.7404	0.000123375	0.00311683	0.328393	0.566607	0.807958	3.25	0.00114927	0.11033
X	P{EP}Imp[EP760]	Imp	451	612	594	519	0.575729	0.466307	0.109422	27.6896	1.42428e-07	1.13942e-05	2.59616	0.107123	0.378081	2.78	0.0054752	0.438016
3	P{EP}faf[EP381]	faf	213	235	916	599	0.524554	0.39538	0.129174	8.84494	0.00293902	0.0427494	0.0265985	0.870447	0.953915	2.5	0.0123059	0.590685
2	P{EP}grau[EP688]	grau	639	663	895	619	0.509217	0.408851	0.100366	22.4674	2.1374e-06	9.32685e-05	4.33249	0.0373916	0.224349	2.12	0.0338744	0.727295
3	P{EP}EP3301	Naa60	641	659	610	423	0.506923	0.409487	0.0974361	14.4706	0.000142366	0.00341678	1.15321	0.282878	0.613068	1.68	0.092351	0.828863
3	P{EP}EP331	Nmdar1	627	621	836	571	0.497596	0.405828	0.0917682	9.35058	0.00222914	0.0382139	0.939775	0.332336	0.678813	1.52	0.127719	0.83751
3	P{EP}EP3444	beg	855	600	936	571	0.412371	0.378898	0.0334727	10.7685	0.00103244	0.0215466	1.31882	0.250804	0.601801	-1.49	0.136095	0.83751
X	P{EP}EP1203		444	524	783	673	0.541322	0.462225	0.079097	8.30294	0.0039581	0.0542825	2.33383	0.12659	0.409487	1.4	0.160589	0.858007
X	P{EP}hiw[EP1308]	hiw	369	281	154	116	0.432308	0.42963	0.00267806	10.1131	0.00147221	0.0271793	0.181158	0.67038	0.880556	-1.3	0.19527	0.862528
X	P{EP}EP1315	CG2930	268	200	254	181	0.42735	0.416092	0.0112585	8.44026	0.00367003	0.0518122	1.21761	0.26983	0.608068	-1.14	0.253113	0.903524
X	P{EP}EP1448		394	305	218	156	0.436338	0.417112	0.0192253	9.54758	0.00200213	0.0355935	0.967808	0.325227	0.670664	-0.94	0.347368	0.968284
2	P{EP}EP682[EP682]	CG5525, EP682	693	463	724	394	0.400519	0.352415	0.048104	9.06246	0.0026091	0.040399	4.55675	0.0327892	0.212687	-0.45	0.654668	0.979267
X	P{EP}EP911	tlk	769	794	615	630	0.507997	0.506024	0.00197334	1.06096	0.302995	0.706501	20.4344	6.17119e-06	0.000269288	-2.53	0.0113306	0.590685
X	P{EP}EP1405	CG15771, lin-52	368	420	629	733	0.532995	0.538179	-0.00518422	4.54866	0.0329445	0.298365	50.43	1.23494e-12	5.92771e-10	-2.46	0.0137209	0.597258
3	P{EP}EP3697[EP3697]	Atg2	679	560	838	441	0.451977	0.344801	0.107177	0.0444232	0.833068	0.949633	12.734	0.000359071	0.00749366	2.4	0.0161757	0.597258
X	P{EP}EP1464	CG8188	581	502	901	529	0.463527	0.36993	0.0935972	4.32624	0.037529	0.321678	30.653	3.08542e-08	3.70251e-06	2.27	0.0231581	0.694744
2	P{EP}und[EP424]	und	288	225	1016	493	0.438596	0.326706	0.11189	0.0670959	0.795613	0.938315	20.6448	5.52878e-06	0.000265381	2.22	0.026254	0.700106
3	P{EP}EP3676	CG18869	384	303	1060	545	0.441048	0.339564	0.101484	0.535498	0.464304	0.79278	19.6549	9.27674e-06	0.000342526	1.89	0.0586548	0.796154
3	P{EP}EP3273	CG5199	961	801	993	563	0.454597	0.361825	0.0927719	0.000859567	0.976611	0.998947	6.56234	0.0104159	0.0943327	1.87	0.0614729	0.797486
3	P{EP}Arp66B[EP3640]	Arp3	516	480	513	439	0.481928	0.461134	0.0207933	2.97548	0.0845352	0.461101	18.3736	1.81559e-05	0.00058099	-1.86	0.0632266	0.798652
2	P{EP}CG5780[EP2315]	CG5780, EP2315	253	198	398	305	0.439024	0.433855	0.00516948	0.0503971	0.822374	0.949633	7.62023	0.0057717	0.0692891	-1.83	0.0668568	0.818896
2	P{EP}EP882a	CG9062	549	477	475	381	0.464912	0.445093	0.0198188	1.80612	0.178975	0.616151	13.86	0.00019695	0.00455943	-1.76	0.0777445	0.828863
2	P{EP}Rab6[EP2397]	Rab6	484	369	431	213	0.432591	0.330745	0.101846	0.473282	0.491481	0.806347	7.54105	0.00603089	0.0692891	1.75	0.080821	0.828863
3	P{EP}EP3651	LysB	430	365	588	457	0.459119	0.437321	0.0217989	0.0565	0.812116	0.949633	8.52505	0.00350292	0.04804	-1.73	0.0831614	0.828863
X	P{EP}CG7502[EP1326]	RhoGAP18B	589	653	507	527	0.525765	0.509671	0.0160937	4.7238	0.0297479	0.279981	18.9337	1.35341e-05	0.000464025	-1.61	0.106907	0.83751
X	P{EP}CHES-1-like[EP1342]	CHES-1-like	482	503	515	502	0.51066	0.493609	0.0170512	0.966978	0.325435	0.716834	10.9845	0.000918782	0.0169621	-1.48	0.139614	0.837685
X	P{EP}Dredd[EP1412]	Dredd	162	164	253	256	0.503067	0.502947	0.00012053	0.0838793	0.772108	0.931277	7.6625	0.00563804	0.0692891	-1.41	0.159007	0.858007
X	P{EP}EP1397	CG1673	731	756	550	521	0.508406	0.486461	0.0219449	1.07341	0.300177	0.706298	8.55597	0.0034439	0.04804	-1.4	0.160479	0.858007
2	P{EP}EP2202	spict	512	374	756	386	0.422122	0.338004	0.0841184	1.75795	0.18488	0.616151	9.99384	0.00157065	0.0269254	1.24	0.216537	0.890065
3	P{EP}EP3233	CG6678	554	442	946	529	0.443775	0.358644	0.085131	0.503748	0.477858	0.802	7.53154	0.00606279	0.0692891	1.23	0.217661	0.890065
3	P{EP}CG14962[EP3709]	CG14962	475	376	1139	635	0.441833	0.357948	0.083885	0.591711	0.441758	0.784023	9.45041	0.00211102	0.0334947	1.16	0.246726	0.903524
3	P{EP}lin-28[EP915]	lin-28	671	602	594	453	0.472899	0.432665	0.0402339	1.68599	0.194131	0.622541	6.83216	0.00895309	0.0895309	-1.07	0.285268	0.903524
3	P{EP}EP3469	CG15514	411	372	445	347	0.475096	0.438131	0.0369645	1.30031	0.254157	0.693155	6.68541	0.00972053	0.0914873	-1.02	0.308528	0.937299
2	P{EP}CG4738[EP372]	Nup160	456	386	638	464	0.458432	0.421053	0.0373797	0.694805	0.404535	0.757686	6.69622	0.00966178	0.0914873	-1	0.317819	0.95012
2	P{EP}EP628	CG9864	596	434	657	343	0.421359	0.343	0.0783592	2.18962	0.138944	0.593399	6.92293	0.00850976	0.0887975	0.97	0.333025	0.95012
2	P{EP}Traf1[EP578]	Traf1	634	542	784	564	0.460884	0.418398	0.0424867	1.34191	0.246697	0.684479	7.0977	0.00771828	0.0841994	-0.89	0.375032	0.97748
X	P{EP}EP1130	CG12643, p1130	224	250	253	257	0.527426	0.503922	0.0235046	1.98895	0.158451	0.60605	7.92704	0.00487014	0.0631802	-0.83	0.405627	0.979267
X	P{EP}EP1317	CG32549	361	304	309	194	0.457143	0.385686	0.071457	3.81925	0.050667	0.333153	6.58229	0.0102998	0.0943327	0.78	0.437531	0.979267
X	P{EP}EP1318	EP1318	342	393	754	759	0.534694	0.501652	0.0330415	4.62698	0.0314729	0.290519	21.5915	3.37341e-06	0.000202404	-0.76	0.44988	0.979267
2	P{EP}EP1244	CG14756, EP1244	239	171	555	286	0.417073	0.340071	0.0770018	1.21565	0.270216	0.699407	6.68602	0.00971718	0.0914873	0.68	0.496233	0.979267
2	P{EP}Syx5[EP2313]	Syx5	360	315	924	660	0.466667	0.416667	0.05	1.39364	0.237791	0.679404	7.55602	0.00598099	0.0692891	-0.44	0.657549	0.979267
X	P{EP}EP1148		232	269	261	261	0.536926	0.5	0.0369261	3.50969	0.0610109	0.366068	7.1114	0.00765953	0.0841994	-0.42	0.675671	0.979267
3	P{EP}EP3068[EP3068]	EP3068, ird1	669	630	1014	763	0.484988	0.429375	0.0556131	4.82789	0.0280029	0.279981	9.80534	0.00174006	0.028801	-0.38	0.704524	0.979267
3	P{EP}EP3588	mus308	291	274	647	491	0.484956	0.431459	0.0534971	2.07953	0.149286	0.595599	6.98408	0.00822379	0.0877204	-0.35	0.724228	0.979267
3	P{EP}Fmr1[EP3517]	Fmr1	386	273	431	317	0.414264	0.423797	-0.00953276	4.33424	0.0373531	0.321678	2.99435	0.0835555	0.33146	-2.69	0.0071496	0.490258
2	P{EP}EP2619[EP2619]	Pros?5	561	405	730	516	0.419255	0.414125	0.00512946	2.44301	0.11805	0.572363	5.05715	0.0245245	0.178796	-2.56	0.0103837	0.590685
2	P{EP}EP2444	EP2444	218	197	470	245	0.474699	0.342657	0.132041	1.5797	0.208803	0.642472	5.02049	0.0250491	0.178796	2.43	0.0150647	0.597258
X	P{EP}svr[EP356]	svr	480	426	211	202	0.470199	0.489104	-0.0189054	2.25015	0.133602	0.593399	3.69072	0.0547162	0.279402	-2.32	0.0201532	0.644902
X	P{EP}EP382[EP382]	csw, EP382	294	243	304	269	0.452514	0.469459	-0.016945	3.87228	0.0490897	0.331749	1.70865	0.191161	0.51917	-2.23	0.0258858	0.700106
X	P{EP}EP1116	vfl	458	527	761	596	0.535025	0.439204	0.0958213	6.3183	0.0119498	0.147075	0.0611949	0.804617	0.928404	2.19	0.0283183	0.71541
X	P{EP}EP975		343	358	459	312	0.510699	0.404669	0.10603	0.689902	0.406198	0.757686	4.40157	0.0359058	0.222381	2.17	0.0300088	0.720211
X	P{EP}EP1450		292	229	335	277	0.439539	0.452614	-0.013075	6.36137	0.0116632	0.147075	0.254812	0.613707	0.834503	-2.11	0.0347677	0.727295
3	P{EP}EP3293	Sodh-2	304	286	358	203	0.484746	0.361854	0.122892	2.14176	0.143338	0.593399	2.26979	0.131918	0.414828	2.11	0.0348496	0.727295
2	P{EP}E(Pc)[EP608]	E(Pc)	233	159	353	248	0.405612	0.412646	-0.00703335	2.3287	0.127008	0.593399	2.25608	0.133091	0.414828	-2.07	0.0387405	0.731506
3	P{EP}EP3412	Ada2b	298	220	332	245	0.42471	0.42461	0.000100373	1.89161	0.16902	0.606231	2.4324	0.118851	0.401749	-2.06	0.0398036	0.731506
X	P{EP}EP1167	CG1632, Corp	542	598	709	541	0.524561	0.4328	0.0917614	3.99999	0.0455006	0.331749	0.481462	0.487761	0.750631	2.05	0.0407146	0.731506
2	P{EP}v(2)k05816[EP695]	v(2)k05816	283	195	291	205	0.40795	0.413306	-0.00535666	2.51357	0.11287	0.558531	1.94581	0.163039	0.472023	-2.04	0.0411472	0.731506
2	P{EP}Hop[EP418]	Hop	435	374	862	485	0.462299	0.360059	0.10224	1.08277	0.298079	0.706298	3.04421	0.0810256	0.324102	1.99	0.0466608	0.785991
3	P{EP}EP3325	Lk6, Myo61F	255	200	324	253	0.43956	0.438475	0.00108557	0.433317	0.510366	0.806347	4.93568	0.0263077	0.180396	-1.96	0.0498816	0.785991
X	P{EP}EP1595[EP1595]	EP1595	275	285	350	235	0.508929	0.401709	0.107219	0.432943	0.510548	0.806347	3.8678	0.0492209	0.266598	1.96	0.0502648	0.785991
3	P{EP}CG1523[EP313]	CG1523, CG1647	277	253	465	263	0.477358	0.361264	0.116095	1.08652	0.297244	0.706298	3.15649	0.0756257	0.317492	1.95	0.0507619	0.785991
3	P{EP}CG11966[EP1156]	CG11966	685	556	685	506	0.448026	0.424853	0.0231727	0.241819	0.622896	0.895179	5.0007	0.0253371	0.178796	-1.93	0.053554	0.796154
3	P{EP}EP697	CG32138	219	203	433	245	0.481043	0.361357	0.119686	1.17226	0.278937	0.699407	2.8319	0.0924091	0.354851	1.92	0.0553736	0.796154
2	P{EP}CG17912[EP819]	CG17912	196	179	561	317	0.477333	0.361048	0.116285	1.68537	0.194212	0.622541	1.81292	0.178158	0.503036	1.89	0.0588599	0.796154
X	P{EP}EP1425	CG6106	383	431	361	272	0.529484	0.4297	0.0997842	3.87352	0.0490534	0.331749	0.421297	0.516291	0.776864	1.88	0.0597115	0.796154
X	P{EP}eas[EP400]	eas	313	329	264	181	0.512461	0.406742	0.105719	0.781696	0.376623	0.747329	2.2677	0.132096	0.414828	1.82	0.0686757	0.818896
2	P{EP}Vha16[EP2372]	Vha16-1	362	341	698	432	0.485064	0.382301	0.102763	4.8339	0.0279055	0.279981	0.00494338	0.943948	0.972448	1.81	0.0699474	0.818896
X	P{EP}EP1453	CHES-1-like	292	252	174	158	0.463235	0.475904	-0.0126683	2.20284	0.137757	0.593399	1.51981	0.217648	0.574016	-1.8	0.071828	0.820891
X	P{EP}EP1321[EP1321]	CG2145, EP1321	119	134	354	250	0.529644	0.413907	0.115737	1.20914	0.271502	0.699407	1.98131	0.159252	0.466104	1.77	0.0771449	0.828863
X	P{EP}EP953		237	189	344	279	0.443662	0.447833	-0.00417109	4.4624	0.0346488	0.307989	0.0716664	0.788926	0.919137	-1.72	0.0859951	0.828863
3	P{EP}CG33104[EP469]	eca	374	339	451	264	0.475456	0.369231	0.106225	1.22595	0.268197	0.699407	1.7129	0.190609	0.51917	1.72	0.0860546	0.828863
X	P{EP}EP1314	ade5	220	188	255	224	0.460784	0.467641	-0.0068566	1.9127	0.166664	0.60605	1.24057	0.265361	0.608068	-1.69	0.0916511	0.828863
2	P{EP}EP2427	CG13204	370	272	313	220	0.423676	0.412758	0.010918	1.09913	0.294457	0.706298	2.01507	0.155744	0.458632	-1.68	0.0938665	0.828863
3	P{EP}EP995[EP995]	EP995	189	143	426	313	0.430723	0.423545	0.00717756	0.779292	0.377358	0.747329	2.90896	0.0880884	0.34376	-1.67	0.095185	0.828863
3	P{EP}EP3564	CG1146, CG33232	355	332	610	375	0.483261	0.380711	0.10255	2.25334	0.133327	0.593399	0.65736	0.417494	0.731376	1.66	0.0963469	0.828863
X	P{EP}eas[EP1319]	eas	191	212	255	184	0.526055	0.419134	0.10692	1.55023	0.213101	0.65152	0.964189	0.326134	0.670664	1.66	0.0973968	0.828863
3	P{EP}Cct1[EP3346]	Cct1	660	490	790	522	0.426087	0.397866	0.0282211	3.85446	0.0496139	0.331749	0.113985	0.735653	0.905419	-1.65	0.0984912	0.828863
X	P{EP}EP495	Pfrx	237	232	215	136	0.49467	0.387464	0.107205	0	1	1	4.30647	0.0379676	0.224993	1.65	0.0990655	0.828863
X	P{EP}CG11756[EP1610]	CG11756	212	237	281	207	0.52784	0.42418	0.103659	1.93189	0.164552	0.60605	0.661611	0.415992	0.731376	1.65	0.0995382	0.828863
2	P{EP}CG6393[EP2457]	Snp	400	317	325	243	0.44212	0.427817	0.014303	0.0135183	0.90744	0.981016	4.77137	0.0289368	0.192912	-1.64	0.101231	0.828863
X	P{EP}EP1457	EP1457, Grip	262	252	138	83	0.490272	0.375566	0.114707	0.0473154	0.827802	0.949633	3.9975	0.0455678	0.260387	1.64	0.101881	0.828863
X	P{EP}EP1498	CG11663, CG43867	135	107	275	230	0.442149	0.455446	-0.0132968	2.68023	0.101601	0.513354	0.344897	0.557016	0.80211	-1.61	0.106316	0.83751
2	P{EP}egl[EP938]	egl	313	258	347	184	0.451839	0.346516	0.105323	0.13384	0.714483	0.914938	3.05046	0.0807144	0.324102	1.59	0.111879	0.83751
2	P{EP}CG2790[EP412]	CG2790	313	215	413	268	0.407197	0.393539	0.0136581	2.89294	0.0889685	0.47983	0.306137	0.58006	0.816507	-1.58	0.11399	0.83751
3	P{EP}Prosbeta2[EP3067]	Prosbeta2	258	189	294	206	0.422819	0.412	0.0108188	1.83951	0.175009	0.616151	0.743392	0.388577	0.722284	-1.57	0.115679	0.83751
X	P{EP}CBP[EP1201]	CBP	371	348	157	149	0.484006	0.486928	-0.00292254	0.353329	0.552235	0.821659	2.48248	0.11512	0.394698	-1.55	0.120561	0.83751
3	P{EP}CG5720[EP3716]	Nab2	388	324	522	288	0.455056	0.355556	0.0995006	0	1	1	4.87345	0.0272729	0.18438	1.54	0.122637	0.83751
3	P{EP}Nlp[EP3555]	Nlp	362	326	355	208	0.473837	0.369449	0.104388	1.00306	0.316571	0.706762	1.32286	0.250079	0.601801	1.53	0.125567	0.83751
2	P{EP}Hnf4[EP2449]	Hnf4	155	111	428	300	0.417293	0.412088	0.00520532	0.774743	0.378754	0.747329	2.63192	0.104735	0.375171	-1.53	0.125912	0.83751
2	P{EP}c(2)M[EP2115]	c(2)M	304	250	1040	576	0.451264	0.356436	0.0948279	0.110818	0.739215	0.91919	5.00956	0.0252078	0.178796	1.51	0.129845	0.83751
X	P{EP}EP1651		253	273	565	424	0.519011	0.428716	0.0902955	1.21113	0.271108	0.699407	0.764787	0.381834	0.718747	1.5	0.132863	0.83751
X	P{EP}Parg[EP351]	Parg	198	202	260	176	0.505	0.40367	0.10133	0.158678	0.690377	0.905965	2.61337	0.105967	0.37677	1.5	0.133108	0.83751
2	P{EP}EP420	CG10764	255	204	538	282	0.444444	0.343902	0.100542	0	1	1	5.41679	0.019944	0.165054	1.5	0.133713	0.83751
X	P{EP}EP908	pico	277	239	250	214	0.463178	0.461207	0.0019714	2.0964	0.147647	0.59555	0.663589	0.415296	0.731376	-1.5	0.133841	0.83751
X	P{EP}bif[EP395]	bif	166	156	231	221	0.484472	0.488938	-0.004466	0.144666	0.703685	0.910132	4.01161	0.045188	0.260387	-1.5	0.13482	0.83751
2	P{EP}EP2332	Pp2A-29B	491	377	688	474	0.434332	0.407917	0.0264144	0.349106	0.55462	0.821659	3.07425	0.0795415	0.323559	-1.49	0.135668	0.83751
X	P{EP}rut[EP399]	CG14408, rut	317	318	297	204	0.500787	0.407186	0.0936018	0.0838216	0.772184	0.931277	2.49202	0.114425	0.394698	1.48	0.139267	0.837685
X	P{EP}EP1431	CG2865	97	114	181	134	0.540284	0.425397	0.114888	1.7186	0.189873	0.619995	0.372079	0.541873	0.796774	1.46	0.143698	0.851543
3	P{EP}EP3065	CG5789	295	252	372	207	0.460695	0.357513	0.103182	0.0735647	0.786216	0.936435	3.12623	0.0770417	0.318793	1.45	0.147933	0.858007
X	P{EP}EP1352	CG2930	236	228	232	150	0.491379	0.39267	0.0987092	0.0252336	0.873786	0.960211	3.73421	0.053309	0.278134	1.44	0.150458	0.858007
2	P{EP}EP2140	lov	257	222	506	290	0.463466	0.364322	0.0991439	0.724142	0.394789	0.751979	1.19935	0.273451	0.610495	1.41	0.157117	0.858007
2	P{EP}EP1224	CG42389	300	220	366	249	0.423077	0.404878	0.0181989	0.941079	0.332	0.724365	1.2406	0.265355	0.608068	-1.4	0.162615	0.858007
2	P{EP}CG10413[EP2164]	CG10413	240	193	302	157	0.445727	0.342048	0.10368	0.00375049	0.951167	0.986872	3.31193	0.0687786	0.311126	1.39	0.163311	0.858007
3	P{EP}Pk61C[EP3091]	Pdk1	242	198	412	310	0.45	0.429363	0.0206371	0.0434469	0.834886	0.949633	3.94292	0.047069	0.264609	-1.38	0.167107	0.858007
X	P{EP}fs(1)N[EP1336]	fs(1)N	302	266	223	192	0.46831	0.462651	0.00565926	1.62758	0.202038	0.633844	0.688835	0.406561	0.731376	-1.37	0.170244	0.858007
3	P{EP}EP3284	sba	317	263	508	281	0.453448	0.356147	0.0973013	0.00524519	0.942265	0.985617	4.59912	0.0319884	0.210335	1.37	0.170249	0.858007
3	P{EP}EP3717	Meics	275	246	503	299	0.472169	0.372818	0.099351	0.630067	0.427331	0.779919	1.39878	0.236927	0.598553	1.37	0.170276	0.858007
X	P{EP}CG18850[EP426]	CG18850, pcx	204	178	218	189	0.465969	0.464373	0.00159512	1.2917	0.255735	0.693519	0.796523	0.372135	0.711652	-1.36	0.174595	0.858007
3	P{EP}EP3504	VhaPPA1-1	257	216	392	216	0.45666	0.355263	0.101396	0.00566036	0.940027	0.985617	3.70796	0.0541535	0.279402	1.36	0.174788	0.858007
3	P{EP}CG15514[EP1005]	CG15514	445	389	485	287	0.466427	0.371762	0.0946652	0.449105	0.50276	0.806347	1.48649	0.222761	0.581117	1.36	0.175176	0.858007
2	P{EP}EP1153	uzip, zip	248	177	508	334	0.416471	0.396675	0.019796	1.31629	0.251259	0.693127	0.649003	0.420469	0.73391	-1.34	0.181026	0.862528
2	P{EP}EP502	CG8854	347	257	291	199	0.425497	0.406122	0.0193742	0.859863	0.353777	0.744794	1.10562	0.293036	0.622378	-1.33	0.18333	0.862528
X	P{EP}EP1461	CG3812	226	184	258	206	0.44878	0.443966	0.00481497	3.4891	0.061774	0.366068	0.00392032	0.950075	0.972448	-1.33	0.184775	0.862528
2	P{EP}Smg5[EP2171]	Smg5	327	216	483	291	0.39779	0.375969	0.0218211	4.76759	0.0290005	0.279981	0.176578	0.674331	0.881958	-1.32	0.185982	0.862528
2	P{EP}CG14478[EP2283]	CG14478	275	212	486	342	0.435318	0.413043	0.0222748	0.158269	0.690755	0.905965	3.20076	0.0736041	0.315446	-1.32	0.186431	0.862528
X	P{EP}EP1467	CG5273	225	203	218	193	0.474299	0.469586	0.00471269	0.73881	0.390042	0.747588	1.23571	0.266299	0.608068	-1.31	0.189795	0.862528
2	P{EP}EP2611	CG3714	675	465	542	330	0.407895	0.37844	0.0294544	6.18165	0.0129082	0.15112	0.0878777	0.766893	0.912881	-1.31	0.191651	0.862528
2	P{EP}spi[EP2378]	spi	328	252	469	243	0.434483	0.341292	0.0931906	0.225477	0.634898	0.898971	5.33969	0.0208452	0.169588	1.3	0.192704	0.862528
2	P{EP}EP2185	CG30456	417	360	446	263	0.46332	0.370945	0.0923755	1.16101	0.281257	0.699407	0.456029	0.499486	0.763545	1.3	0.195072	0.862528
2	P{EP}l(2)k03704[EP840]	CG3776, RpL19	281	226	357	191	0.445759	0.34854	0.0972192	0.00458972	0.945987	0.986872	2.8124	0.0935381	0.355453	1.29	0.195866	0.862528
2	P{EP}EP437	CG10927	258	200	351	250	0.436681	0.415973	0.0207078	0.107006	0.743579	0.919892	2.8037	0.094047	0.355453	-1.27	0.204274	0.888117
X	P{EP}CG14207[EP766]	CG14207	333	364	393	307	0.522238	0.438571	0.0836667	2.0684	0.150379	0.595599	0.0445021	0.832922	0.938667	1.26	0.206857	0.888117
3	P{EP}EP3042	Exn	414	381	227	138	0.479245	0.378082	0.101163	1.92153	0.165688	0.60605	0.352497	0.552703	0.800747	1.26	0.208539	0.888117
2	P{EP}POSH[EP1206]	POSH	307	273	251	148	0.47069	0.370927	0.0997623	1.66613	0.196778	0.622541	0.256599	0.612466	0.834503	1.26	0.209078	0.888117
2	P{EP}Vha68-2[EP2364]	Vha68-2	316	213	310	192	0.402647	0.38247	0.0201764	3.64102	0.0563724	0.356036	0.00151414	0.968961	0.979494	-1.25	0.212027	0.890065
X	P{EP}Pk17E[EP1563]	Pk17E	117	96	472	383	0.450704	0.447953	0.00275101	1.66345	0.197138	0.622541	0.103045	0.748205	0.909034	-1.23	0.219053	0.890065
X	P{EP}caz[EP1564]	caz	305	280	254	222	0.478632	0.466387	0.0122459	0.633633	0.426026	0.779919	1.11234	0.291574	0.622024	-1.22	0.2215	0.890065
3	P{EP}EP564	GstD2	534	435	456	325	0.448916	0.416133	0.0327832	0.142964	0.705352	0.910132	1.74233	0.186844	0.518412	-1.22	0.222516	0.890065
2	P{EP}Tal[EP489]	Tal	233	199	450	259	0.460648	0.365303	0.0953449	0.474778	0.490797	0.806347	0.960945	0.326949	0.670664	1.21	0.224437	0.890331
X	P{EP}EP1160	trol	302	346	265	215	0.533951	0.447917	0.086034	3.92552	0.0475585	0.331749	0.0569091	0.81145	0.933288	1.2	0.231194	0.903524
2	P{EP}EP2499	CG6568	227	155	373	234	0.405759	0.385502	0.0202567	2.25205	0.133438	0.593399	0.0124089	0.911303	0.967755	-1.19	0.232924	0.903524
2	P{EP}EP2528		415	295	374	238	0.415493	0.388889	0.0266041	2.36296	0.124246	0.593399	0.0814001	0.775409	0.912881	-1.18	0.236588	0.903524
2	P{EP}cul-4[EP2518]	Cul-4	153	106	620	398	0.409266	0.390963	0.0183037	1.26286	0.26111	0.699407	0.256315	0.612663	0.834503	-1.18	0.236915	0.903524
X	P{EP}EP1212		145	148	471	335	0.505119	0.415633	0.0894867	0.11893	0.730198	0.91919	2.34117	0.125995	0.409487	1.17	0.240117	0.903524
X	P{EP}skpA[EP1423]	skpA	125	135	157	113	0.519231	0.418519	0.100712	0.608234	0.435454	0.784023	0.623579	0.429721	0.744022	1.17	0.24026	0.903524
2	P{EP}SP2637[EP2381]	SP2637	237	171	385	253	0.419118	0.396552	0.0225659	1.03604	0.308743	0.706501	0.481784	0.487615	0.750631	-1.17	0.243093	0.903524
X	P{EP}fs(1)h[EP439]	fs(1)h	163	136	329	265	0.454849	0.446128	0.00872155	1.92347	0.165475	0.60605	0.0314526	0.859234	0.948486	-1.16	0.246695	0.903524
2	P{EP}EP595a[EP595a]	EP595a	296	212	281	183	0.417323	0.394397	0.0229263	1.48069	0.223666	0.666652	0.244729	0.620812	0.841778	-1.14	0.255307	0.903524
2	P{EP}Roc2[EP2487]	Roc2	112	82	169	120	0.42268	0.415225	0.0074555	0.36284	0.546933	0.8204	1.28274	0.25739	0.608068	-1.13	0.256781	0.903524
2	P{EP}EP2182	EP2182	240	168	389	247	0.411765	0.388365	0.0233999	1.72172	0.189471	0.619995	0.0694191	0.792184	0.920699	-1.13	0.257764	0.903524
X	P{EP}EP308	ATP7, CG10347	237	231	388	270	0.49359	0.410334	0.0832554	0.00405925	0.949199	0.986872	2.72533	0.098768	0.366397	1.12	0.261852	0.903524
3	P{EP}Taf1[EP421]	Taf1	302	243	197	144	0.445872	0.422287	0.0235842	0.181176	0.670365	0.905965	1.22746	0.267902	0.608068	-1.12	0.262425	0.903524
3	P{EP}EP984	qless	442	377	273	158	0.460317	0.366589	0.0937281	0.0964331	0.756153	0.926421	1.26406	0.260884	0.608068	1.11	0.266526	0.903524
2	P{EP}Mef2[EP2002a]	Mef2	408	337	281	207	0.452349	0.42418	0.0281687	0.199405	0.655201	0.901136	3.45565	0.0630361	0.301358	-1.1	0.270514	0.903524
2	P{EP}CG6746[EP1118]	CG6746	514	378	351	228	0.423767	0.393782	0.0299844	1.51837	0.217866	0.661873	0.272623	0.601578	0.827385	-1.1	0.270544	0.903524
X	P{EP}EP425	CG44774, Ptp4E	151	118	189	145	0.438662	0.434132	0.00452997	3.38012	0.0659873	0.386267	0.0952179	0.757646	0.909175	-1.1	0.270842	0.903524
2	P{EP}CG1344[EP2646]	CG1344	482	402	714	422	0.454751	0.371479	0.0832723	0.399233	0.527485	0.806347	0.672107	0.412318	0.731376	1.1	0.271122	0.903524
3	P{EP}CG14126[EP498]	CG44837	314	294	397	255	0.483553	0.391104	0.0924483	2.034	0.153816	0.600257	0.0138158	0.906432	0.967755	1.09	0.274539	0.903524
X	P{EP}EP1337	CG13001	184	200	394	305	0.520833	0.436338	0.0844957	1.02223	0.311991	0.706501	0.108721	0.741605	0.905777	1.09	0.275157	0.903524
2	P{EP}CG8414[EP525]	CG8414	334	312	299	192	0.482972	0.391039	0.0919334	3.99434	0.0456532	0.331749	0.125477	0.723169	0.901713	1.08	0.281228	0.903524
3	P{EP}btsz[EP3567]	btsz	611	460	1122	714	0.429505	0.388889	0.0406162	2.79273	0.0946927	0.494049	0.154985	0.693816	0.8883	-1.08	0.282049	0.903524
X	P{EP}sdk[EP369]	sdk	592	514	178	145	0.464738	0.448916	0.0158214	4.08763	0.0431981	0.331749	0.0537708	0.816627	0.933288	-1.08	0.282286	0.903524
2	P{EP}EP393[EP393]	Pal2	303	227	342	229	0.428302	0.401051	0.0272511	0.546282	0.459841	0.79278	0.776534	0.378203	0.714715	-1.07	0.282447	0.903524
X	P{EP}EP1341	CG4928	136	123	430	371	0.474903	0.463171	0.0117324	0.420857	0.51651	0.806347	1.40352	0.236135	0.598553	-1.07	0.284802	0.903524
X	P{EP}EP427	CG4406, Hr4	373	368	316	226	0.496626	0.416974	0.079652	0.00732574	0.931792	0.985309	1.41956	0.233477	0.59611	1.07	0.286735	0.903524
X	P{EP}EP1593	Ahcy13, Scamp	219	213	295	204	0.493056	0.408818	0.0842379	0.0069639	0.933494	0.985309	2.26081	0.132685	0.414828	1.06	0.287998	0.903524
3	P{EP}rho[EP3704]	rho	284	224	322	225	0.440945	0.411335	0.0296103	0.401107	0.526518	0.806347	0.756221	0.384514	0.720963	-1.05	0.293158	0.913738
X	P{EP}EP1198	fd3F	314	377	431	380	0.545586	0.468557	0.0770288	7.04219	0.00796114	0.10328	2.26273	0.132521	0.414828	1.04	0.296291	0.917545
2	P{EP}Prosalpha6[EP2318]	Prosalpha1	331	264	213	115	0.443697	0.35061	0.0930877	0.000793519	0.977527	0.998947	1.43505	0.230942	0.59611	1.03	0.303458	0.933717
2	P{EP}EP526	Ir21a	335	254	292	197	0.431239	0.402863	0.0283764	0.405228	0.524402	0.806347	0.80843	0.368585	0.711652	-1.02	0.305807	0.934952
2	P{EP}Rpt1[EP2153]	CG17985, Rpt1	304	232	375	253	0.432836	0.402866	0.0299696	0.284005	0.594088	0.866755	1.03993	0.307839	0.642446	-1.01	0.311499	0.940374
X	P{EP}ari-1[EP317]	ari-1	282	247	430	345	0.466919	0.445161	0.0217574	1.67642	0.195401	0.622541	0.0219926	0.882107	0.957944	-0.99	0.32026	0.95012
3	P{EP}EP3656	Eip63E	297	218	279	181	0.423301	0.393478	0.0298227	2.05827	0.151381	0.595599	0	1	1	-0.99	0.32461	0.95012
2	P{EP}MESK2[EP2347]	MESK2	383	301	344	237	0.440058	0.407917	0.0321411	0.049428	0.824062	0.949633	1.52882	0.21629	0.573586	-0.98	0.325875	0.95012
3	P{EP}EP3397	Dys	536	390	399	250	0.421166	0.385208	0.0359583	4.22978	0.0397205	0.331749	0.179941	0.671424	0.880556	-0.98	0.326373	0.95012
2	P{EP}CG8083[EP2412]	CG8083	231	175	404	211	0.431034	0.343089	0.0879451	0.287515	0.591818	0.866074	4.22323	0.0398742	0.23341	0.97	0.329901	0.95012
X	P{EP}EP1083	CG5928, Tsp5D	201	179	482	396	0.471053	0.451025	0.0200276	0.876157	0.349256	0.738516	0.259834	0.610235	0.834503	-0.97	0.331393	0.95012
2	P{EP}CG8347[EP2509]	EcR	167	144	400	236	0.463023	0.371069	0.0919533	0.447762	0.5034	0.806347	0.400673	0.526742	0.785568	0.97	0.333895	0.95012
3	P{EP}Nrx[EP604]	Nrx-IV	293	249	207	119	0.45941	0.365031	0.0943789	0.0439438	0.833958	0.949633	1.06783	0.301437	0.634604	0.97	0.334521	0.95012
2	P{EP}rdgBbeta[EP2360]	rdgBbeta	166	115	211	134	0.409253	0.388406	0.0208469	1.37156	0.241544	0.682007	0.0381669	0.845108	0.941737	-0.96	0.338737	0.956435
2	P{EP}CG5899[EP701]	Etl1	202	173	519	309	0.461333	0.373188	0.0881449	0.447131	0.5037	0.806347	0.358158	0.549531	0.800196	0.95	0.342559	0.961569
3	P{EP}CG4719[EP3476]	Tnks	546	482	748	555	0.468872	0.42594	0.0429315	0.816473	0.366213	0.747329	5.86046	0.0154847	0.132726	-0.93	0.35034	0.968284
X	P{EP}cv[EP1349]	CG3160, cv	489	456	511	357	0.48254	0.41129	0.0712494	0.596794	0.439804	0.784023	3.39264	0.0654881	0.308179	0.93	0.351003	0.968284
3	P{EP}Klp67A[EP3516]	Klp67A	352	305	745	458	0.464231	0.380715	0.0835165	0.230895	0.630861	0.897573	0.80393	0.369921	0.711652	0.93	0.353892	0.970638
2	P{EP}EP736	CG11007	643	526	1015	698	0.449957	0.407472	0.042485	0.155706	0.693141	0.905965	4.39063	0.0361369	0.222381	-0.92	0.358684	0.970638
3	P{EP}phol[EP559]	phol	276	213	397	266	0.435583	0.401207	0.0343762	0.736492	0.390787	0.747588	0.173763	0.676789	0.882768	-0.92	0.359015	0.970638
3	P{EP}EP545	jnj	429	384	507	322	0.472325	0.38842	0.0839049	1.00411	0.316318	0.706762	0.0846526	0.771089	0.912881	0.91	0.363158	0.970638
X	P{EP}Fas2[EP1462]	Fas2	112	110	260	242	0.495495	0.482072	0.0134238	0	1	1	3.23331	0.0721545	0.315446	-0.91	0.36334	0.970638
3	P{EP}CG7161[EP3616]	Oseg1	388	328	376	223	0.458101	0.372287	0.0858134	0.0290575	0.864646	0.960211	1.09676	0.294978	0.623742	0.91	0.365433	0.970638
X	P{EP}EP1616		122	100	817	625	0.45045	0.433426	0.0170247	1.7536	0.185425	0.616151	0.487119	0.485215	0.750631	-0.9	0.366011	0.970638
3	P{EP}EP3222	CG5808	338	313	251	161	0.480799	0.390777	0.0900221	1.77887	0.182288	0.616151	0.0114365	0.914835	0.968626	0.9	0.368203	0.971084
2	P{EP}EP2002b[EP2002b]	EP2002b	216	188	340	206	0.465347	0.377289	0.0880572	0.736059	0.390926	0.747588	0.0837298	0.772305	0.912881	0.89	0.374486	0.97748
X	P{EP}CG32604[EP784]	l(1)G0007	394	391	409	303	0.498089	0.425562	0.0725274	0.0290302	0.864709	0.960211	0.827512	0.362993	0.711652	0.88	0.376737	0.97748
X	P{EP}EP1209	Nek2	181	166	242	206	0.478386	0.459821	0.0185647	0.386379	0.534209	0.8116	0.548891	0.458771	0.750631	-0.88	0.380248	0.979267
2	P{EP}CG11166[EP2475]	Eaf	107	91	417	241	0.459596	0.366261	0.0933346	0.189955	0.662954	0.905965	0.799921	0.371117	0.711652	0.87	0.385141	0.979267
X	P{EP}EP1402	CG15893	204	185	213	139	0.475578	0.394886	0.080692	0.591227	0.441945	0.784023	3.14702	0.0760657	0.317492	0.86	0.387493	0.979267
X	P{EP}PPP4R2r[EP307]	PPP4R2r	198	234	361	314	0.541667	0.465185	0.0764815	3.74262	0.0530412	0.344051	1.42422	0.23271	0.59611	0.86	0.390094	0.979267
X	P{EP}CG32672[EP362]	Atg8a	615	637	1122	894	0.508786	0.443452	0.0653336	0.953927	0.328722	0.720486	0.00714367	0.932643	0.972448	0.86	0.390131	0.979267
X	P{EP}EP1350[EP1350]	B-H2, EP1350	252	199	346	249	0.441242	0.418487	0.0227543	5.17511	0.0229127	0.249957	1.3812	0.239897	0.601801	-0.85	0.394452	0.979267
2	P{EP}CG3760[EP548]	CG3760	276	229	364	262	0.453465	0.41853	0.034935	0.174674	0.675991	0.905965	3.29822	0.0693552	0.311126	-0.84	0.398763	0.979267
2	P{EP}EP570	CG13993	474	383	522	304	0.446908	0.368039	0.0788691	0.0244404	0.87577	0.960211	0.808644	0.368521	0.711652	0.84	0.401764	0.979267
3	P{EP}EP3290	ort	144	138	148	95	0.489362	0.390947	0.0984152	1.36168	0.243247	0.6828	0.0058759	0.938898	0.972448	0.84	0.402165	0.979267
2	P{EP}Arf51F[EP2612]	Arf51F, CG8155	407	278	506	296	0.405839	0.369077	0.0367621	4.03669	0.0445212	0.331749	0.682629	0.408683	0.731376	-0.83	0.404997	0.979267
3	P{EP}EP3572	CG34355	343	247	459	282	0.418644	0.380567	0.0380773	3.09654	0.0784589	0.43791	0.504635	0.47747	0.750631	-0.83	0.40728	0.979267
2	P{EP}EP2366	Prosap	639	536	658	403	0.45617	0.37983	0.0763399	0.686796	0.407256	0.757686	0.0547971	0.814917	0.933288	0.82	0.413033	0.979267
2	P{EP}CG8569[EP1182]	CG8569	201	152	387	205	0.430595	0.346284	0.0843111	0.266629	0.605602	0.877139	3.44585	0.0634107	0.301358	0.81	0.416431	0.979267
3	P{EP}EP413	CG9986	529	482	855	566	0.476756	0.398311	0.0784446	1.97215	0.16022	0.60605	0.149191	0.69931	0.8883	0.81	0.417774	0.979267
3	P{EP}CG15014[EP671]	CG15014	558	434	764	495	0.4375	0.393169	0.0443308	1.22037	0.269288	0.699407	0	1	1	-0.81	0.420248	0.979267
X	P{EP}CG1583[EP325]	GIIIspla2, Traf6	524	553	692	559	0.513463	0.446843	0.0666208	1.47222	0.224995	0.666652	0.095631	0.757137	0.909175	0.8	0.421621	0.979267
X	P{EP}Pfrx[EP1150]	Pfrx	244	254	377	292	0.51004	0.436472	0.0735678	0.448917	0.50285	0.806347	0.0995569	0.752362	0.909034	0.8	0.422174	0.979267
X	P{EP}EP1489	CG9281	211	200	388	272	0.486618	0.412121	0.0744968	0.117503	0.731758	0.91919	2.4417	0.118148	0.401749	0.8	0.422857	0.979267
X	P{EP}tomosyn[EP1359]	tomosyn	275	285	309	288	0.508929	0.482412	0.0265165	0.432943	0.510548	0.806347	3.91467	0.0478664	0.264609	-0.8	0.423375	0.979267
2	P{EP}cathD[EP2151]	cathD	246	203	435	255	0.452116	0.369565	0.0825506	0.112934	0.736829	0.91919	0.547431	0.459369	0.750631	0.79	0.426732	0.979267
2	P{EP}Pka-R2[EP2162]	CG12128, Pka-R2	475	328	762	444	0.408468	0.368159	0.040309	4.12076	0.04236	0.331749	1.16656	0.28011	0.613068	-0.79	0.427376	0.979267
2	P{EP}CG1600[EP398]	Drat	132	110	178	101	0.454545	0.362007	0.0925383	0.10424	0.7468	0.921501	0.525033	0.468702	0.750631	0.78	0.433835	0.979267
X	P{EP}CG32541[EP1644]	CG43759	274	283	259	241	0.508079	0.482	0.026079	0.379495	0.537874	0.814446	3.20868	0.0732485	0.315446	-0.78	0.436171	0.979267
2	P{EP}pAbp[EP310]	pAbp	306	228	360	231	0.426966	0.390863	0.0361033	0.645862	0.421596	0.779919	0.144352	0.703993	0.8916	-0.78	0.436755	0.979267
X	P{EP}alpha-Man-I[EP556]	alpha-Man-I	162	155	325	283	0.488959	0.465461	0.0234985	0.0473035	0.827824	0.949633	1.31365	0.251735	0.601801	-0.76	0.444492	0.979267
X	P{EP}EP1097	CG43736	238	267	202	167	0.528713	0.452575	0.0761383	2.29082	0.130141	0.593399	0.15214	0.696498	0.8883	0.76	0.445064	0.979267
X	P{EP}EP1030	CG44325, CG7246	193	192	318	286	0.498701	0.47351	0.0251914	0.0204999	0.88615	0.966709	2.38637	0.122397	0.409487	-0.76	0.446131	0.979267
3	P{EP}EP3635	E(spl)m3-HLH	257	228	252	192	0.470103	0.432432	0.0376707	0.453911	0.500483	0.806347	2.93575	0.0866384	0.340872	-0.76	0.449339	0.979267
X	P{EP}EP1599	mRpS25	202	223	306	251	0.524706	0.450628	0.0740775	1.49638	0.22123	0.666652	0.14942	0.69909	0.8883	0.75	0.453963	0.979267
2	P{EP}Eps-15[EP2513]	Eps-15	363	250	245	146	0.40783	0.373402	0.0344288	3.24976	0.0714337	0.409297	0.161442	0.687832	0.8883	-0.75	0.455613	0.979267
X	P{EP}EP1356	His3.3B	176	148	210	162	0.45679	0.435484	0.0213063	1.88967	0.16924	0.606231	0.0747087	0.7846	0.916322	-0.75	0.455663	0.979267
3	P{EP}EP3104[EP3104]	CG17180, EP3104	297	228	388	253	0.434286	0.394696	0.0395899	0.899952	0.342795	0.728059	0.0049097	0.944139	0.972448	-0.74	0.456862	0.979267
2	P{EP}EP616	CG10931, sub	317	277	383	241	0.46633	0.386218	0.080112	1.18856	0.275621	0.699407	0.022474	0.880833	0.957944	0.73	0.467886	0.979267
X	P{EP}EP319	sesB	231	243	280	220	0.512658	0.44	0.0726582	0.589412	0.442647	0.784023	0.0129542	0.909383	0.967755	0.71	0.477073	0.979267
3	P{EP}CG7069[EP3224]	CG7069	836	614	989	595	0.423448	0.375631	0.047817	5.79872	0.0160379	0.18329	2.07851	0.149386	0.452191	-0.71	0.478418	0.979267
3	P{EP}Mbs[EP3727]	Mbs	276	201	724	443	0.421384	0.379606	0.0417778	2.14104	0.143405	0.593399	0.921483	0.337086	0.685599	-0.71	0.480613	0.979267
3	P{EP}CG8219[EP3072]	CG8219	262	200	407	221	0.4329	0.351911	0.0809896	0.900488	0.342651	0.728059	4.53276	0.0332519	0.212812	0.7	0.481496	0.979267
2	P{EP}achi[EP2107]	achi	262	217	492	294	0.453027	0.374046	0.0789813	0.150196	0.698348	0.905965	0.284988	0.59345	0.823284	0.7	0.48332	0.979267
X	P{EP}EP790	rdgB	326	296	291	235	0.475884	0.446768	0.0291162	0.917834	0.338044	0.727979	0.0386177	0.844208	0.941737	-0.7	0.484178	0.979267
3	P{EP}EP3492	RhoGAP71E	392	282	635	381	0.418398	0.375	0.0433976	3.5882	0.0581913	0.362751	1.42143	0.233168	0.59611	-0.7	0.486103	0.979267
3	P{EP}Cctgamma[EP754]	Cctgamma	362	309	321	196	0.460507	0.37911	0.0813965	0.084543	0.771233	0.931277	0.435369	0.509366	0.773721	0.7	0.48701	0.979267
X	P{EP}EP496	Gr5a, Tre1	138	116	173	134	0.456693	0.436482	0.0202108	1.48797	0.222531	0.666652	0.0454129	0.831247	0.938667	-0.69	0.487363	0.979267
2	P{EP}EP2346	Cap-G	189	164	359	222	0.464589	0.3821	0.0824894	0.597268	0.439622	0.784023	0.00363217	0.951943	0.972448	0.69	0.487751	0.979267
2	P{EP}EP2450	Herp	262	204	370	246	0.437768	0.399351	0.0384176	0.0799674	0.777342	0.93281	0.684152	0.408161	0.731376	-0.69	0.489604	0.979267
X	P{EP}Smox[EP1371]	EP1371, Smox	111	105	204	140	0.486111	0.406977	0.0791344	0.0692707	0.792402	0.938315	1.72898	0.188541	0.51917	0.69	0.490388	0.979267
X	P{EP}Ptp10D[EP1332]	Ptp10D	132	137	299	229	0.509294	0.433712	0.0755816	0.218498	0.640187	0.901136	0.166162	0.683546	0.8883	0.69	0.490624	0.979267
3	P{EP}EP1112	AP-1?, MBD-like	347	305	370	273	0.467791	0.424572	0.0432191	0.438816	0.507695	0.806347	2.70561	0.0999959	0.366397	-0.69	0.490729	0.979267
X	P{EP}eas[EP770]	eas	171	178	268	251	0.510029	0.483622	0.0264063	0.31371	0.575413	0.844642	3.61132	0.0573876	0.285489	-0.68	0.494276	0.979267
X	P{EP}amn[EP346]	amn	316	320	265	202	0.503145	0.432548	0.0705965	0.167264	0.682555	0.905965	0.188143	0.664467	0.878634	0.68	0.49436	0.979267
3	P{EP}EP3578	14-3-3?, CG7156	390	321	309	214	0.451477	0.409178	0.042299	0.0346321	0.852369	0.960211	0.559013	0.454658	0.750631	-0.68	0.495303	0.979267
3	P{EP}Cnx99A[EP3522]	Cnx99A	427	352	312	216	0.451861	0.409091	0.0427705	0.0300146	0.862457	0.960211	0.558166	0.455	0.750631	-0.68	0.496549	0.979267
2	P{EP}EP732	CG1809	201	152	349	188	0.430595	0.350093	0.0805018	0.266629	0.605602	0.877139	2.51544	0.112736	0.394698	0.68	0.49768	0.979267
2	P{EP}lat[EP1168]	lat	174	136	284	157	0.43871	0.356009	0.0827006	0.0388514	0.843743	0.955181	1.35541	0.244335	0.601801	0.68	0.499469	0.979267
2	P{EP}CG4747[EP594]	CG4747	656	515	928	602	0.439795	0.393464	0.046331	0.096087	0.756577	0.926421	0.683184	0.408493	0.731376	-0.67	0.499838	0.979267
X	P{EP}CG1486[EP1192]	CG1486	329	289	415	321	0.467638	0.436141	0.0314962	1.86149	0.172453	0.613165	0.121879	0.727006	0.901713	-0.67	0.50502	0.979267
X	P{EP}EP406	m	218	207	368	310	0.487059	0.457227	0.0298317	0.109165	0.741097	0.91919	0.600719	0.438304	0.750631	-0.65	0.515962	0.979267
X	P{EP}BEST:RE18684[EP1313]	CG11138	276	251	289	233	0.476281	0.44636	0.0299207	0.74525	0.387984	0.747588	0.0313035	0.859565	0.948486	-0.64	0.519094	0.979267
2	P{EP}EP2599[EP2599]	EP2599, gol	346	288	323	195	0.454259	0.376448	0.0778108	0.259236	0.610646	0.88021	0.103064	0.748183	0.909034	0.64	0.522458	0.979267
2	P{EP}gsb-n[EP2362]	gsb-n	139	111	476	271	0.444	0.362784	0.0812155	0	1	1	1.31216	0.252004	0.601801	0.64	0.524314	0.979267
2	P{EP}NaCP60E[EP348]	NaCP60E, RpL41	302	213	351	210	0.413592	0.374332	0.0392607	1.94075	0.163587	0.60605	0.190702	0.662333	0.878232	-0.64	0.525261	0.979267
3	P{EP}CG13298[EP3457]	CG13298	450	391	278	202	0.464923	0.420833	0.0440894	0.341905	0.558732	0.822673	1.55898	0.211815	0.564841	-0.64	0.525271	0.979267
3	P{EP}DNApol-delta[EP3292]	DNApol-delta, Hip14	352	286	355	241	0.448276	0.404362	0.0439134	0.114781	0.734766	0.91919	0.307457	0.579245	0.816507	-0.63	0.529821	0.979267
3	P{EP}EP3340[EP3340]	EP3340, SelR	399	349	576	368	0.466578	0.389831	0.076747	0.413082	0.520409	0.806347	0.0492273	0.824413	0.935504	0.63	0.531735	0.979267
X	P{EP}CG10777[EP1347]	CG10777	284	244	272	207	0.462121	0.43215	0.0299709	2.28928	0.13027	0.593399	0.20865	0.647827	0.866176	-0.62	0.533741	0.979267
X	P{EP}EP1614	Lsd-2	229	221	194	140	0.491111	0.419162	0.0719494	0.0281654	0.866721	0.960211	0.731281	0.392468	0.722284	0.62	0.534801	0.979267
X	P{EP}EP1088[EP1088]	sd	316	333	330	305	0.513097	0.480315	0.0327821	0.849035	0.356825	0.747329	3.73743	0.0532061	0.278134	-0.62	0.535739	0.979267
X	P{EP}CG1702[EP1525]	GstT3	354	364	197	153	0.506964	0.437143	0.0698209	0.409579	0.522183	0.806347	0.0410973	0.83935	0.941737	0.61	0.540076	0.979267
3	P{EP}CG6178[EP3251]	CG6178	292	258	547	401	0.469091	0.422996	0.0460951	0.448499	0.503049	0.806347	3.60251	0.0576926	0.285489	-0.61	0.543754	0.979267
2	P{EP}CG11070[EP2597]	CG11070	225	188	214	128	0.455206	0.374269	0.0809368	0.201952	0.65315	0.901136	0.117627	0.731623	0.902774	0.61	0.544675	0.979267
2	P{EP}EP2515	CG3927	276	196	434	224	0.415254	0.340426	0.0748287	1.59218	0.207015	0.641077	5.13709	0.0234199	0.178437	0.6	0.545844	0.979267
X	P{EP}EP1217	sn	137	137	250	224	0.5	0.472574	0.0274262	0.0268236	0.869905	0.960211	1.75921	0.184723	0.515505	-0.6	0.551367	0.979267
3	P{EP}Vha13[EP3577]	Vha13	318	272	667	471	0.461017	0.413884	0.0471329	0.0885341	0.766049	0.931277	2.0656	0.150656	0.452191	-0.59	0.554066	0.979267
X	P{EP}EP1607	CG6961	187	185	355	266	0.497312	0.428341	0.0689704	0.00757602	0.930639	0.985309	0.505065	0.477283	0.750631	0.59	0.555722	0.979267
X	P{EP}EP1537	CG2061	229	266	254	224	0.537374	0.468619	0.0687545	3.54154	0.0598498	0.366068	1.33663	0.24763	0.601801	0.58	0.558807	0.979267
3	P{EP}EP3683	EP3683, RpS10a	565	501	857	619	0.469981	0.419377	0.0506045	0.987569	0.320337	0.711861	4.33338	0.037372	0.224349	-0.58	0.561075	0.979267
X	P{EP}EP1535	CG3939	177	206	287	253	0.537859	0.468519	0.0693405	2.80027	0.0942487	0.494049	1.49903	0.220821	0.579202	0.58	0.562787	0.979267
X	P{EP}EP1340[EP1340]	EP1340	312	310	279	243	0.498392	0.465517	0.032875	0.0277951	0.867591	0.960211	1.1327	0.2872	0.618189	-0.58	0.563537	0.979267
3	P{EP}CG5376[EP709]	CG5376	333	293	754	487	0.468051	0.392425	0.0756257	0.438432	0.50788	0.806347	0.00447818	0.946646	0.972448	0.58	0.564603	0.979267
3	P{EP}drpr[EP522]	drpr, Oseg4	224	185	439	262	0.452323	0.373752	0.078571	0.0113499	0.915157	0.98135	1.11399	0.291217	0.622024	0.58	0.564942	0.979267
X	P{EP}CG2982[EP1316]	CG2982	131	110	225	170	0.456432	0.43038	0.0260518	1.43083	0.23163	0.677901	0.235417	0.627536	0.844242	-0.58	0.565221	0.979267
3	P{EP}dsd[EP3400]	dsd	253	206	341	232	0.448802	0.404887	0.0439152	0.0699472	0.791414	0.938315	0.324464	0.568937	0.807958	-0.57	0.567049	0.979267
3	P{EP}EP3362	CG7213, Dscam4	387	333	409	257	0.4625	0.385886	0.0766141	0.16753	0.682317	0.905965	0.155306	0.693515	0.8883	0.57	0.568875	0.979267
3	P{EP}SNF4Agamma[EP3176	SNF4Agamma	801	616	768	480	0.434721	0.384615	0.0501059	2.35006	0.125278	0.593399	0.400202	0.526985	0.785568	-0.57	0.571508	0.979267
2	P{EP}CG13586[EP2287]	ITP	485	398	819	501	0.450736	0.379545	0.0711907	0.151557	0.697052	0.905965	0.0799597	0.777352	0.912881	0.56	0.572239	0.979267
X	P{EP}CG33174[EP1101]	inaE	345	315	255	204	0.477273	0.444444	0.0328283	0.838468	0.359835	0.747329	0.00688624	0.933865	0.972448	-0.56	0.576687	0.979267
X	P{EP}EP1500	AP-1gamma	173	158	247	170	0.477341	0.407674	0.0696675	0.416066	0.518907	0.806347	2.01669	0.155578	0.458632	0.56	0.578006	0.979267
2	P{EP}EP2090	IntS8	499	426	143	88	0.460541	0.380952	0.0795882	1.00913	0.31511	0.706762	0.00544401	0.941183	0.972448	0.55	0.579925	0.979267
X	P{EP}Ptp10D[EP1172]	Ptp10D	156	152	272	235	0.493506	0.463511	0.0299956	0.00297855	0.956476	0.989458	0.915893	0.338556	0.685682	-0.55	0.580114	0.979267
2	P{EP}CG10934[EP538]	CG10934	440	342	332	215	0.43734	0.393053	0.0442871	0.152994	0.69569	0.905965	0.222707	0.636985	0.854058	-0.54	0.588219	0.979267
3	P{EP}EP3386	CG17270	574	469	424	255	0.449664	0.375552	0.0741121	0.118172	0.731025	0.91919	0.89135	0.345112	0.693112	0.54	0.59003	0.979267
3	P{EP}CG13623[EP3059]	CG13623	362	318	369	237	0.467647	0.391089	0.0765579	0.447548	0.503502	0.806347	0.0130098	0.90919	0.967755	0.54	0.590331	0.979267
3	P{EP}MESK4[EP1015]	CG3678, MESK4	458	383	347	239	0.45541	0.40785	0.0475604	0.000751083	0.978136	0.998947	0.52543	0.468535	0.750631	-0.53	0.593557	0.979267
2	P{EP}TM4SF[EP2638]	TM4SF	449	346	440	251	0.43522	0.363242	0.0719784	0.265026	0.606688	0.877139	1.1603	0.281403	0.613068	0.53	0.594281	0.979267
X	P{EP}EP1143	sdt	162	156	361	306	0.490566	0.458771	0.0317954	0.0257478	0.872518	0.960211	0.721886	0.395526	0.724628	-0.53	0.594537	0.979267
X	P{EP}EP404	lin-52	395	408	449	360	0.508095	0.444994	0.0631008	0.5496	0.458481	0.79278	0.0201372	0.887154	0.961251	0.53	0.595916	0.979267
X	P{EP}EP1605	ptr	195	209	297	243	0.517327	0.45	0.0673267	0.803306	0.370107	0.747329	0.123218	0.72557	0.901713	0.53	0.597172	0.979267
3	P{EP}EP3317	CG13921	205	148	217	132	0.419263	0.378223	0.04104	1.78625	0.181384	0.616151	0.330833	0.565169	0.807958	-0.52	0.60037	0.979267
3	P{EP}CG11486[EP3109]	CG11486, CG32486	194	173	330	213	0.47139	0.392265	0.0791245	0.403873	0.525096	0.806347	0.00268138	0.958702	0.974952	0.52	0.602796	0.979267
X	P{EP}hiw[EP1305]	be, hiw	124	124	503	382	0.5	0.431638	0.0683616	0.0242728	0.876193	0.960211	0.425695	0.514109	0.776013	0.52	0.603128	0.979267
X	P{EP}CG2924[EP1596]	CG2924	136	139	232	179	0.505455	0.435523	0.0699314	0.119163	0.729944	0.91919	0.0816496	0.775074	0.912881	0.52	0.605001	0.979267
X	P{EP}Dsp1[EP355]	Dsp1	175	148	309	230	0.458204	0.426716	0.0314882	1.748	0.186129	0.616151	0.543732	0.46089	0.750631	-0.51	0.608111	0.979267
3	P{EP}EP3085[EP3085]	CG6163, EP3085	226	171	217	118	0.43073	0.352239	0.0784917	0.931916	0.334365	0.726224	2.3736	0.123402	0.409487	0.51	0.608905	0.979267
X	P{EP}EP1452[EP1452]	Drak	234	179	309	207	0.433414	0.401163	0.0322513	6.19166	0.0128354	0.15112	3.50017	0.0613624	0.297515	-0.51	0.613549	0.979267
X	P{EP}EP1515	br	331	323	151	112	0.493884	0.425856	0.0680283	0.00363551	0.951921	0.986872	0.294203	0.587539	0.822213	0.5	0.615119	0.979267
3	P{EP}CG6782[EP3364]	fabp, sea	309	272	236	151	0.468158	0.390181	0.0779775	0.413419	0.520239	0.806347	0.0162839	0.898459	0.966951	0.5	0.615983	0.979267
3	P{EP}RhoBTB[EP3099]	Ide, RhoBTB	254	224	276	177	0.468619	0.390728	0.0778908	0.36392	0.546337	0.8204	0.0130548	0.909033	0.967755	0.5	0.617383	0.979267
X	P{EP}EP555	CG32521	344	381	233	199	0.525517	0.460648	0.0648691	2.70095	0.100289	0.512113	0.581177	0.445851	0.750631	0.49	0.624845	0.979267
X	P{EP}EP773	eIF4E-7	307	313	312	246	0.504839	0.44086	0.0639785	0.238495	0.625295	0.895945	0.00628945	0.936789	0.972448	0.48	0.628233	0.979267
2	P{EP}EP2423	CG6329	202	164	490	293	0.448087	0.374202	0.0738856	0.0217405	0.88278	0.965226	0.274461	0.600355	0.827385	0.48	0.629894	0.979267
X	P{EP}futsch[EP1419]	CG11448, futsch	176	137	392	267	0.4377	0.405159	0.0325403	4.06799	0.0437032	0.331749	3.66354	0.0556152	0.281003	-0.48	0.630459	0.979267
X	P{EP}EP1322	GS	303	299	162	140	0.496678	0.463576	0.0331016	0.00634194	0.936527	0.985617	0.548119	0.459087	0.750631	-0.48	0.631358	0.979267
X	P{EP}EP1526	pcm	341	297	196	149	0.465517	0.431884	0.0336332	2.22954	0.135394	0.593399	0.157907	0.691091	0.8883	-0.48	0.632886	0.979267
X	P{EP}CG8051[EP991]	CG8051	133	140	299	276	0.512821	0.48	0.0328205	0.345148	0.556873	0.822458	3.32643	0.0681745	0.311126	-0.47	0.639066	0.979267
2	P{EP}EP2268	CG42321, cnn	220	183	338	207	0.454094	0.379817	0.0742778	0.158958	0.690118	0.905965	0.0282315	0.866566	0.953333	0.47	0.640766	0.979267
3	P{EP}CG6190[EP3214]	Ube3a	386	296	179	114	0.434018	0.389078	0.0449391	1.20143	0.273037	0.699407	0.0223608	0.881131	0.957944	-0.47	0.641219	0.979267
3	P{EP}Slbp[EP1045]	Slbp	374	318	400	278	0.459538	0.410029	0.0495081	0.05946	0.807351	0.949633	0.806402	0.369186	0.711652	-0.46	0.643568	0.979267
3	P{EP}EP3223[EP3223]	EP3223	314	267	418	291	0.459552	0.410437	0.0491153	0.0501898	0.822733	0.949633	0.885517	0.346695	0.69339	-0.46	0.644403	0.979267
3	P{EP}EP758	lama	439	377	395	251	0.46201	0.388545	0.0734649	0.166178	0.683531	0.905965	0.062562	0.802492	0.928183	0.46	0.646752	0.979267
2	P{EP}EP2248	POSH	241	166	308	177	0.407862	0.364948	0.042914	2.14853	0.142706	0.593399	0.681745	0.408987	0.731376	-0.45	0.649334	0.979267
3	P{EP}EP3407	Drsl6	269	207	322	204	0.434874	0.387833	0.0470412	0.769989	0.38022	0.747329	0.0670471	0.795686	0.922534	-0.45	0.653787	0.979267
X	P{EP}EP335		265	255	372	278	0.490385	0.427692	0.0626923	0.045652	0.83081	0.949633	0.578056	0.447075	0.750631	0.44	0.657022	0.979267
X	P{EP}EP1504	EP1504	384	377	324	273	0.495401	0.457286	0.0381144	0	1	1	0.532909	0.465387	0.750631	-0.43	0.664191	0.979267
X	P{EP}Actn[EP1193]	Actn, usp	302	340	290	254	0.529595	0.466912	0.0626833	3.07004	0.0797477	0.439987	1.3287	0.249037	0.601801	0.43	0.665867	0.979267
X	P{EP}EP620	kat80	222	240	235	220	0.519481	0.483516	0.035964	1.10515	0.29314	0.706298	3.14813	0.0760139	0.317492	-0.43	0.669348	0.979267
2	P{EP}EP993	CG30069	212	155	604	328	0.422343	0.351931	0.070412	0.70933	0.399666	0.757594	3.91137	0.0479605	0.264609	0.42	0.671267	0.979267
X	P{EP}C3G[EP1613]	C3G	140	138	204	176	0.496403	0.463158	0.033245	0.00201266	0.964217	0.995321	0.662862	0.415551	0.731376	-0.42	0.671363	0.979267
3	P{EP}EP635[EP635]	XNP	470	367	472	299	0.438471	0.387808	0.0506627	0.917216	0.338207	0.727979	0.0993768	0.752579	0.909034	-0.42	0.67214	0.979267
X	P{EP}Top3beta[EP1432]	Top3beta	178	136	272	181	0.433121	0.399558	0.0335625	4.7474	0.0293426	0.279981	3.30992	0.0688628	0.311126	-0.42	0.676503	0.979267
3	P{EP}eRF1[EP3195]	eRF1	260	226	319	227	0.465021	0.415751	0.0492697	0.200744	0.654121	0.901136	1.17476	0.278425	0.613068	-0.41	0.678893	0.979267
2	P{EP}CG30497[EP2618]	CG30497	100	84	293	207	0.456522	0.414	0.0425217	0.112676	0.737118	0.91919	2.05437	0.15177	0.452482	-0.41	0.683326	0.979267
X	P{EP}EP973	dnc	341	335	209	177	0.495562	0.458549	0.0370129	0	1	1	0.405556	0.524234	0.785568	-0.41	0.683901	0.979267
3	P{EP}tau[EP3203]	RpS10a, tau	134	101	705	438	0.429787	0.383202	0.0465851	0.594139	0.440823	0.784023	0.493611	0.482321	0.750631	-0.41	0.684935	0.979267
X	P{EP}ras[EP1093]	ras	115	96	271	198	0.454976	0.422175	0.0328015	1.34783	0.245657	0.684479	0.781391	0.376716	0.714715	-0.4	0.68792	0.979267
3	P{EP}EP3423	14-3-3?, CG7156	214	185	415	265	0.463659	0.389706	0.0739533	0.123133	0.725661	0.91919	0.0379213	0.845601	0.941737	0.4	0.690474	0.979267
X	P{EP}sesB[EP1577]	Ant2, sesB	160	149	326	235	0.482201	0.418895	0.0633058	0.204699	0.650955	0.901136	1.2585	0.261934	0.608068	0.39	0.695319	0.979267
2	P{EP}otk[EP2017]	otk	265	186	454	262	0.412417	0.365922	0.0464951	1.82937	0.176202	0.616151	0.905611	0.341282	0.688299	-0.39	0.695774	0.979267
2	P{EP}CG8230[EP2605]	CG8230	235	168	351	207	0.416873	0.370968	0.0459057	1.21225	0.270888	0.699407	0.357076	0.550135	0.800196	-0.38	0.700276	0.979267
X	P{EP}EP1376		197	200	132	103	0.503778	0.438298	0.0654805	0.12116	0.72778	0.91919	0.0170159	0.896214	0.966703	0.38	0.70383	0.979267
2	P{EP}EP882b		202	162	302	200	0.445055	0.398406	0.0466486	0.000914159	0.97588	0.998947	0.492896	0.482638	0.750631	-0.38	0.706518	0.979267
3	P{EP}CG10576[EP3271]	CG10576	168	137	439	293	0.44918	0.400273	0.0489071	0.0408652	0.839798	0.952963	0.148955	0.699536	0.8883	-0.38	0.70662	0.979267
3	P{EP}EP3063	CG7560	346	256	260	157	0.425249	0.376499	0.0487504	2.12326	0.145078	0.59519	0.490024	0.483916	0.750631	-0.38	0.707303	0.979267
X	P{EP}EP1641	Inx2, Inx7	189	186	132	113	0.496	0.461224	0.0347755	0.00133201	0.970886	0.998947	0.350465	0.55385	0.800747	-0.37	0.710811	0.979267
3	P{EP}sra[EP3462]	Bin1, sra	323	290	313	209	0.473083	0.400383	0.0727001	0.823046	0.364291	0.747329	0.109423	0.740802	0.905777	0.36	0.715353	0.979267
3	P{EP}CG14959[EP3139]	ckd	211	163	319	182	0.435829	0.363273	0.0725554	0.548473	0.458942	0.79278	1.85037	0.17374	0.4964	0.36	0.715358	0.979267
X	P{EP}His3.3B[EP1598]	His3.3B	306	322	177	145	0.512739	0.450311	0.0624283	0.789139	0.374361	0.747329	0.0795839	0.777862	0.912881	0.36	0.715806	0.979267
2	P{EP}CG13130[EP2238]	---	114	91	599	354	0.443902	0.371459	0.0724439	0	1	1	0.564762	0.452348	0.750631	0.36	0.715823	0.979267
X	P{EP}ligase4[EP385]	Lig4	206	210	375	299	0.504808	0.44362	0.0611875	0.158725	0.690333	0.905965	0.00329655	0.954214	0.972448	0.36	0.716423	0.979267
X	P{EP}EP1507	Hsc70-3	221	195	436	329	0.46875	0.430065	0.0386846	1.15171	0.283191	0.699407	0.481131	0.48791	0.750631	-0.36	0.71999	0.979267
2	P{EP}Sd[EP1173]	RanGAP	299	249	287	179	0.45438	0.38412	0.0702594	0.229303	0.632041	0.897573	0.00129159	0.971331	0.979494	0.35	0.724526	0.979267
X	P{EP}EP1243	RpS14b	412	456	776	682	0.525346	0.467764	0.0575816	3.20148	0.0735715	0.415463	3.84189	0.0499872	0.266598	0.35	0.725723	0.979267
2	P{EP}Akap200[EP2254]	Akap200	235	164	220	114	0.411028	0.341317	0.0697102	1.75986	0.184642	0.616151	2.49287	0.114363	0.394698	0.35	0.726681	0.979267
2	P{EP}EDTP[EP2390]	EDTP	214	179	274	171	0.455471	0.38427	0.0712011	0.201567	0.653459	0.901136	0.00173235	0.9668	0.979494	0.35	0.727687	0.979267
3	P{EP}EP3639	CG10163	443	367	306	205	0.453086	0.401174	0.0519123	0.0113304	0.91523	0.98135	0.132636	0.715714	0.899979	-0.35	0.728443	0.979267
2	P{EP}EP755	CG30424, RpL19	260	208	431	259	0.444444	0.375362	0.0690821	0	1	1	0.184231	0.667762	0.880556	0.35	0.728951	0.979267
2	P{EP}EP2570	Zip42C.1	363	257	428	247	0.414516	0.365926	0.0485902	2.20203	0.13783	0.593399	0.853012	0.355702	0.706143	-0.35	0.729174	0.979267
X	P{EP}fs(1)h[EP1033]	fs(1)h, mys	164	161	294	248	0.495385	0.457565	0.03782	0	1	1	0.502055	0.478599	0.750631	-0.35	0.729747	0.979267
3	P{EP}Synd[EP877]	Synd	413	372	450	304	0.473885	0.403183	0.0707023	1.15148	0.283239	0.699407	0.31027	0.577515	0.816507	0.34	0.73037	0.979267
3	P{EP}EP3613	CG12945	287	226	562	331	0.440546	0.370661	0.0698851	0.428423	0.512764	0.806347	1.89925	0.168163	0.483342	0.34	0.734139	0.979589
X	P{EP}EP1190	CG14818	266	244	215	169	0.478431	0.440104	0.0383272	0.565615	0.452007	0.791837	0.00913721	0.923847	0.972448	-0.34	0.735293	0.979589
X	P{EP}amn[EP971]	amn, Hers	199	236	399	372	0.542529	0.48249	0.0600385	3.90829	0.0480485	0.331749	5.08223	0.0241723	0.178796	0.34	0.73756	0.979589
2	P{EP}Top3alpha[EP2272]	Top3alpha	268	242	427	314	0.47451	0.423752	0.0507581	1.91936	0.165927	0.60605	5.15036	0.0232415	0.178437	-0.33	0.738773	0.979589
X	P{EP}EP1623		158	142	306	236	0.473333	0.435424	0.037909	0.566407	0.45169	0.791837	0.110839	0.739191	0.905777	-0.33	0.74329	0.982863
X	P{EP}EP443[EP443]	EP443	305	317	327	268	0.509646	0.45042	0.0592261	0.532195	0.465685	0.79278	0.151549	0.697059	0.8883	0.32	0.745928	0.983145
3	P{EP}EP3236	CG34355, Pli	352	279	671	427	0.442155	0.388889	0.0532664	0.416548	0.518665	0.806347	0.0920606	0.761574	0.911609	-0.32	0.747672	0.983145
3	P{EP}EP595b[EP595b]	CG6745, CG6765, EP595b	717	588	747	464	0.450575	0.383154	0.0674203	0.101562	0.749963	0.923032	0.528211	0.46736	0.750631	0.32	0.751703	0.983145
3	P{EP}gwl[EP515]	CG7718, gwl	393	337	396	273	0.461644	0.408072	0.0535721	0.133534	0.714796	0.914938	0.618917	0.43145	0.744022	-0.31	0.753745	0.983145
2	P{EP}Oda[EP2104]	Oda	203	175	450	316	0.462963	0.412533	0.0504303	0.541193	0.461939	0.79278	2.8575	0.0909489	0.35206	-0.31	0.758967	0.987274
X	P{EP}EP1031		238	249	231	190	0.511294	0.451306	0.0599872	0.515433	0.472796	0.799092	0.132525	0.715828	0.899979	0.3	0.762835	0.989624
3	P{EP}EP935[EP935]	eIF-1A	279	268	439	317	0.489945	0.419312	0.070633	2.73912	0.0979185	0.505386	2.19429	0.138523	0.426226	0.29	0.768557	0.991315
X	P{EP}Ubc-E2H[EP1303]	Ubc-E2H	205	178	198	147	0.464752	0.426087	0.038665	1.40521	0.235853	0.677901	0.375579	0.539979	0.796774	-0.29	0.770062	0.991315
2	P{EP}Nup44A[EP2417]	Nup44A	228	201	301	200	0.468531	0.399202	0.0693299	1.03685	0.308555	0.706501	0.545477	0.460172	0.750631	0.29	0.770335	0.991315
X	P{EP}EP1338	CG43736	197	195	319	249	0.497449	0.43838	0.0590687	0.00898669	0.924475	0.985309	0.0396426	0.842181	0.941737	0.28	0.777486	0.992798
X	P{EP}EP1421[EP1421]	EP1421	167	143	376	274	0.46129	0.421538	0.0397519	1.40969	0.235108	0.677901	1.1529	0.282943	0.613068	-0.28	0.778903	0.992798
X	P{EP}g[EP514]	CG11134, g	230	180	210	129	0.439024	0.380531	0.0584934	5.09307	0.0240216	0.253651	5.26596	0.0217465	0.172935	0.28	0.77976	0.992798
X	P{EP}EP442	CG11700	178	178	249	196	0.5	0.440449	0.0595506	0.0348762	0.851855	0.960211	0.00778842	0.929676	0.972448	0.27	0.784395	0.996057
2	P{EP}EP2404		232	201	455	299	0.464203	0.396552	0.0676515	0.705644	0.400894	0.757594	0.570002	0.450258	0.750631	0.27	0.789605	0.99905
2	P{EP}EP2141	homer, Liprin-?	223	186	449	303	0.454768	0.402926	0.0518422	0.184256	0.667741	0.905965	1.25434	0.262725	0.608068	-0.26	0.796028	0.99905
2	P{EP}EP2644	CG33298, Oatp30B	196	168	454	295	0.461538	0.393858	0.06768	0.444483	0.504966	0.806347	0.35841	0.54939	0.800196	0.26	0.797886	0.99905
3	P{EP}CG5180[EP3073]	CG5180	420	340	413	267	0.447368	0.392647	0.0547214	0.176647	0.674271	0.905965	0.00141016	0.970045	0.979494	-0.25	0.799254	0.99905
2	P{EP}CG30143[EP2424]	---	198	146	361	216	0.424419	0.37435	0.0500685	0.54552	0.460154	0.79278	0.195366	0.658488	0.875552	-0.25	0.801137	0.99905
2	P{EP}CanB2[EP774]	CanB2	276	219	370	223	0.442424	0.376054	0.0663703	0.00686002	0.933991	0.985309	0.131955	0.716413	0.899979	0.25	0.802145	0.99905
3	P{EP}EP3632	Dsk	410	333	300	195	0.448183	0.393939	0.0542436	0.137564	0.710715	0.914593	0	1	1	-0.25	0.803231	0.99905
2	P{EP}garz[EP2028]	CG8841, garz	268	184	469	260	0.40708	0.356653	0.0504267	2.48971	0.114593	0.561272	2.14384	0.143143	0.437635	-0.24	0.807023	0.99905
X	P{EP}Cyp1[EP1073]	Cyp1	169	167	340	266	0.497024	0.438944	0.0580799	0.00520317	0.942496	0.985617	0.0315917	0.858927	0.948486	0.24	0.807474	0.99905
X	P{EP}sesB[EP1393]	Ant2, sesB	188	166	279	195	0.468927	0.411392	0.0575341	0.96647	0.325562	0.716834	1.83505	0.175533	0.498554	0.24	0.813261	0.99905
2	P{EP}morgue[EP1184]	morgue	374	290	259	162	0.436747	0.384798	0.0519489	0.152839	0.695837	0.905965	0.00395026	0.949885	0.972448	-0.23	0.819072	0.99905
X	P{EP}EP1174	EP1174, PsGEF	134	128	232	188	0.48855	0.447619	0.0409306	0.0444966	0.832932	0.949633	0.044424	0.833067	0.938667	-0.23	0.820445	0.99905
X	P{EP}CG32604[EP764]	l(1)G0007	224	215	466	376	0.489749	0.446556	0.0431936	0.0496884	0.823606	0.949633	0.0559184	0.813067	0.933288	-0.23	0.820863	0.99905
X	P{EP}Moe[EP1652]	Moe	126	114	298	213	0.475	0.41683	0.0581703	0.3862	0.534303	0.8116	1.35308	0.244741	0.601801	0.23	0.821933	0.99905
3	P{EP}CG10277[EP705]	CG10277	324	247	398	242	0.432574	0.378125	0.0544494	1.14721	0.284134	0.699407	0.6162	0.432463	0.744022	-0.22	0.824783	0.99905
X	P{EP}EP1395	CG3939, dnc	143	151	200	167	0.513605	0.455041	0.0585646	0.405317	0.524356	0.806347	0.234912	0.627905	0.844242	0.22	0.826141	0.99905
2	P{EP}EP2520		263	212	311	202	0.446316	0.393762	0.0525536	0.00811008	0.928243	0.985309	0.240462	0.623873	0.843546	-0.22	0.828552	0.99905
2	P{EP}CG2264[EP2277]	magu	216	189	330	220	0.466667	0.4	0.0666667	0.833518	0.361257	0.747329	0.66127	0.416112	0.731376	0.21	0.832337	0.99905
3	P{EP}ago[EP1135]	ago	276	209	246	149	0.430928	0.377215	0.0537126	1.12115	0.28967	0.706298	0.425768	0.514073	0.776013	-0.21	0.835114	0.99905
X	P{EP}sgg[EP1576]	sgg	278	259	159	125	0.482309	0.440141	0.0421683	0.350466	0.553849	0.821659	0.00654958	0.935498	0.972448	-0.21	0.836109	0.99905
3	P{EP}EP3093	Kdm2	477	354	962	545	0.425993	0.361646	0.0643471	2.79392	0.0946224	0.494049	6.42529	0.0112506	0.100006	0.2	0.839686	0.99905
X	P{EP}EP1378	CrebB	267	251	423	333	0.484556	0.440476	0.0440798	0.229445	0.631936	0.897573	0.0129236	0.90949	0.967755	-0.2	0.841597	0.99905
X	P{EP}EP1529	CG4313, moody	293	234	432	289	0.444023	0.400832	0.0431906	5.44891	0.0195806	0.218574	4.97596	0.0257019	0.178796	-0.2	0.841799	0.99905
X	P{EP}EP1458		196	162	378	249	0.452514	0.397129	0.0553848	2.57744	0.108397	0.541983	5.2476	0.0219771	0.172935	0.2	0.842457	0.99905
X	P{EP}EP1364	CG3224, Ctr1A	148	147	266	210	0.498305	0.441176	0.0571286	0.0124661	0.9111	0.98135	0.00351853	0.952699	0.972448	0.2	0.843666	0.99905
3	P{EP}EP3610		205	179	326	227	0.466146	0.410488	0.0556576	0.195861	0.658083	0.902513	0.693864	0.404853	0.731376	-0.19	0.847096	0.99905
2	P{EP}lea[EP2582]	lea	356	312	264	177	0.467066	0.401361	0.0657053	1.42882	0.231957	0.677901	0.620275	0.430945	0.744022	0.19	0.847274	0.99905
2	P{EP}EP2484	CG30460	433	335	359	213	0.436198	0.372378	0.0638203	0.203723	0.651732	0.901136	0.287678	0.591712	0.823284	0.19	0.849193	0.99905
3	P{EP}YT521-B[EP3725]	YT521-B	501	411	891	577	0.450658	0.393052	0.0576061	0.0680217	0.794239	0.938315	0	1	1	-0.18	0.85443	0.999905
X	P{EP}CG1640[EP1626]	CG1640	686	746	705	636	0.52095	0.474273	0.0466768	3.88215	0.0488021	0.331749	5.59454	0.0180165	0.151718	-0.18	0.85818	0.999905
X	P{EP}EP970	Vps4	267	283	307	272	0.514545	0.469775	0.04477	0.838849	0.359726	0.747329	1.76757	0.183683	0.515505	-0.18	0.859028	0.999905
2	P{EP}EP366	Nplp4	271	195	359	207	0.418455	0.365724	0.0527306	1.24684	0.264157	0.699407	0.731007	0.392557	0.722284	-0.18	0.861008	0.999905
3	P{EP}CG7430[EP3698]	CG7430	284	259	376	272	0.47698	0.419753	0.0572267	1.07594	0.299607	0.706298	1.94394	0.163241	0.472023	-0.18	0.861008	0.999905
2	P{EP}lola[EP2537]	lola	260	211	508	329	0.447983	0.39307	0.0549125	0.0265001	0.870685	0.960211	0.342944	0.558135	0.80211	-0.16	0.875072	0.999905
3	P{EP}CG1275[EP373]	CG1275	197	145	288	161	0.423977	0.358575	0.065402	1.30727	0.252889	0.693155	2.20389	0.137663	0.426226	0.16	0.876136	0.999905
2	P{EP}CG13211[EP1146]	CG42336	238	177	472	270	0.426506	0.363881	0.0626246	0.528093	0.46741	0.79278	1.16922	0.279562	0.613068	0.15	0.882487	0.999905
X	P{EP}EP1007	Ahcy13	178	194	299	272	0.521505	0.476357	0.0451481	1.04237	0.307271	0.706501	2.69053	0.100946	0.367077	-0.15	0.882663	0.999905
3	P{EP}l(3)S011041[EP3183]		306	237	405	248	0.436464	0.379786	0.0566785	0.745815	0.387804	0.747588	0.499931	0.47953	0.750631	-0.15	0.884275	0.999905
X	P{EP}Pk17E[EP438]	CG6961, Pk17E	228	215	418	317	0.485327	0.431293	0.0540348	0.168367	0.681567	0.905965	0.37586	0.539827	0.796774	0.15	0.884343	0.999905
3	P{EP}EP3542	mthl9, Ptpmeg	230	190	120	79	0.452381	0.396985	0.055396	0.0111443	0.915926	0.98135	0.0110824	0.916159	0.968626	-0.14	0.885639	0.999905
X	P{EP}CkIalpha[EP1555]	CkIalpha, EP1555	138	150	145	132	0.520833	0.476534	0.044299	0.766026	0.381449	0.747329	1.31602	0.251308	0.601801	-0.14	0.890906	0.999905
2	P{EP}Btk29A[EP2167]	Btk29A	180	139	525	312	0.435737	0.37276	0.0629768	0.0940373	0.759106	0.927152	0.393204	0.53062	0.788538	0.13	0.892962	0.999905
X	P{EP}NFAT[EP1329]	NFAT	238	204	186	133	0.461538	0.416928	0.0446106	1.98297	0.159078	0.60605	0.837046	0.360243	0.711591	-0.13	0.897759	0.999905
3	P{EP}Dad[EP3196]	Dad	805	637	755	469	0.441748	0.38317	0.0585776	1.02203	0.312038	0.706501	0.532329	0.465629	0.750631	-0.13	0.898432	0.999905
X	P{EP}EP1023	CG1673	269	270	224	181	0.500928	0.446914	0.0540141	0.0746131	0.784735	0.936435	0.0317812	0.858509	0.948486	0.13	0.900157	0.999905
2	P{EP}EP2059	Swim	276	215	298	179	0.437882	0.375262	0.0626198	0.0813667	0.775454	0.93281	0.130312	0.718108	0.899979	0.12	0.902863	0.999905
X	P{EP}EP444	CG4020	96	86	298	214	0.472527	0.417969	0.0545587	0.369138	0.543474	0.820339	1.23915	0.265635	0.608068	0.12	0.904475	0.999905
3	P{EP}msl-3[EP3144]	msl-3	451	361	243	149	0.444581	0.380102	0.0644792	0.352976	0.552433	0.821659	0.285676	0.593005	0.823284	0.11	0.908982	0.999905
X	P{EP}EP1511	Sec61?	367	348	387	304	0.486713	0.439942	0.0467712	0.200363	0.654428	0.901136	0.0187601	0.891057	0.963304	-0.11	0.910295	0.999905
2	P{EP}EP2454	nrv1	221	161	338	190	0.421466	0.359848	0.0616175	0.798295	0.371604	0.747329	1.20503	0.272319	0.610495	0.11	0.91133	0.999905
2	P{EP}CG3542[EP719]	CG3542	423	330	376	227	0.438247	0.376451	0.0617959	0.111294	0.738675	0.91919	0.119962	0.729076	0.901949	0.11	0.911342	0.999905
2	P{EP}qkr58E-1[EP2103]	qkr58E-1, qkr58E-2	396	272	503	274	0.407186	0.352638	0.0545473	3.66847	0.0554509	0.354886	3.11121	0.0777553	0.318996	-0.11	0.911595	0.999905
X	P{EP}CG3810[EP1588]	Edem1	166	159	294	227	0.489231	0.435701	0.0535302	0.0442764	0.83334	0.949633	0.0984144	0.753741	0.909034	0.11	0.914432	0.999905
2	P{EP}EP2376	CG2811	294	222	536	321	0.430233	0.374562	0.0556701	0.411395	0.521262	0.806347	0.277392	0.598416	0.827385	-0.11	0.914837	0.999905
X	P{EP}EP1362	CG2652, per	307	257	107	72	0.455674	0.402235	0.0534391	3.49016	0.0617346	0.366068	1.15002	0.283544	0.613068	0.1	0.917361	0.999905
X	P{EP}EP804	egh, wds	320	346	231	207	0.51952	0.472603	0.0469168	1.60108	0.20575	0.641077	1.6283	0.201939	0.544554	-0.1	0.918292	0.999905
X	P{EP}CG15770[EP390]	CG42699	85	95	369	332	0.527778	0.473609	0.0541686	0.769748	0.380295	0.747329	2.78949	0.0948844	0.355817	0.1	0.921121	0.999905
X	P{EP}CG2221[EP379]	l(1)G0289	181	160	304	223	0.469208	0.42315	0.0460583	0.910977	0.339855	0.728059	0.796741	0.372069	0.711652	-0.1	0.921534	0.999905
2	P{EP}CG9543[EP2027]	?COP	234	209	360	255	0.471783	0.414634	0.0571491	1.37823	0.240403	0.682007	2.63639	0.104441	0.375171	-0.1	0.923355	0.999905
2	P{EP}EP506	CG3163, HSPC300	198	163	188	123	0.451524	0.395498	0.0560252	0.0775106	0.7807	0.934503	0.198174	0.656199	0.874932	-0.09	0.927963	0.999905
3	P{EP}CG1098[EP3137]	Madm	294	264	320	221	0.473118	0.408503	0.0646155	0.751681	0.385945	0.747588	0.529798	0.466692	0.750631	0.09	0.932099	0.999905
X	P{EP}EP1125[EP1125]	CG2865, EP1125	128	145	230	216	0.531136	0.484305	0.0468306	1.41941	0.233501	0.677901	3.20582	0.0733768	0.315446	-0.08	0.932791	0.999905
3	P{EP}CG31549[EP3625]	CG31549	283	246	421	287	0.465028	0.405367	0.0596611	0.21894	0.639849	0.901136	0.435701	0.509205	0.773721	-0.08	0.937387	0.999905
3	P{EP}EP3389	Pdp1	323	253	249	150	0.439236	0.37594	0.0632963	0.572558	0.449244	0.791837	0.500124	0.479446	0.750631	0.08	0.937712	0.999905
X	P{EP}EP1343	ec	147	131	233	172	0.471223	0.424691	0.0465317	0.631371	0.426853	0.779919	0.518746	0.471377	0.750631	-0.08	0.938962	0.999905
3	P{EP}EP3071	?-Est10	500	388	186	111	0.436937	0.373737	0.0631996	1.16251	0.280946	0.699407	0.470899	0.492574	0.755385	0.08	0.93943	0.999905
3	P{EP}EP3132	Elongin-B	581	462	1432	880	0.442953	0.380623	0.0623302	0.608122	0.435496	0.784023	1.58373	0.208224	0.558366	0.07	0.941276	0.999905
X	P{EP}EG:114D9.1[EP1542]	CG32812, DAAM	128	123	284	221	0.49004	0.437624	0.0524161	0.0253458	0.873508	0.960211	0.0492444	0.824383	0.935504	0.07	0.945124	0.999905
2	P{EP}EP2102	RluA-2	225	182	480	302	0.447174	0.386189	0.0609852	0.0139977	0.90582	0.981016	0.0276517	0.86793	0.953333	0.06	0.952765	0.999905
3	P{EP}Mtl[EP855]	Mtl	212	164	340	206	0.43617	0.377289	0.0588808	0.531991	0.465771	0.79278	0.583986	0.444754	0.750631	-0.06	0.954412	0.999905
X	P{EP}EP1558	Mnt	177	166	159	121	0.483965	0.432143	0.0518222	0.169235	0.680793	0.905965	0.121955	0.726924	0.901713	0.05	0.95742	0.999905
X	P{EP}alpha-Man-I[EP1612]	alpha-Man-I	229	222	146	115	0.492239	0.440613	0.0516264	0.0144	0.904483	0.981016	0.00387113	0.950389	0.972448	0.05	0.962611	0.999905
X	P{EP}EP1429	CG4666	131	108	209	140	0.451883	0.401146	0.0507367	1.76984	0.183402	0.616151	2.36613	0.123994	0.409487	0.04	0.965603	0.999905
X	P{EP}EP1437		269	241	444	324	0.472549	0.421875	0.050674	1.0354	0.308894	0.706501	1.32034	0.25053	0.601801	0.04	0.966254	0.999905
X	P{EP}nej[EP950]	EP950, nej	185	166	293	214	0.472934	0.422091	0.0508437	0.687501	0.407016	0.757686	0.851905	0.356014	0.706143	0.04	0.96846	0.999905
3	P{EP}EP3710		153	117	204	122	0.433333	0.374233	0.0591002	0.504897	0.477356	0.802	0.491465	0.483275	0.750631	-0.04	0.97	0.999905
X	P{EP}CG3249[EP1400]	CG4165, spoon	527	454	528	371	0.462793	0.412681	0.0501123	4.09881	0.0429133	0.331749	3.21186	0.0731064	0.315446	0.04	0.97017	0.999905
X	P{EP}EP1016[EP1016]	CG9921, EP1016	546	601	598	537	0.523976	0.473128	0.0508478	3.86698	0.0492451	0.331749	4.39173	0.0361137	0.222381	0.04	0.970622	0.999905
2	P{EP}MESR3[EP2221]	CG15161, MESR3	309	210	445	238	0.404624	0.348463	0.0561616	3.24534	0.071627	0.409297	3.52538	0.060436	0.296013	-0.04	0.97106	0.999905
2	P{EP}EP730	CG17658	132	91	363	195	0.408072	0.349462	0.0586094	1.16129	0.281199	0.699407	2.71437	0.099448	0.366397	0.03	0.972867	0.999905
3	P{EP}EP681	Rabex-5	426	333	601	364	0.438735	0.377202	0.0615331	0.804696	0.369693	0.747329	1.04734	0.30612	0.641649	0.03	0.97581	0.999905
2	P{EP}Amph[EP2175]	Amph	233	160	500	268	0.407125	0.348958	0.0581663	2.15801	0.141829	0.593399	3.85549	0.0495834	0.266598	0.03	0.976069	0.999905
2	P{EP}EP2590	pcs	309	249	371	235	0.446237	0.387789	0.0584478	0.00881218	0.92521	0.985309	0.0518785	0.819826	0.934719	-0.03	0.978562	0.999905
2	P{EP}CG12424[EP2095]	ckn	238	211	422	294	0.469933	0.410615	0.0593187	1.21491	0.270362	0.699407	2.32743	0.127111	0.409487	-0.02	0.98081	0.999905
2	P{EP}CG9025[EP2065]	Fem-1	903	669	490	285	0.425573	0.367742	0.0578306	2.24618	0.133944	0.593399	0.78784	0.374754	0.713817	-0.02	0.982734	0.999905
X	P{EP}EP1449	ade5	338	343	358	298	0.503671	0.454268	0.0494028	0.203256	0.652105	0.901136	0.37037	0.542803	0.796774	-0.02	0.984132	0.999905
X	P{EP}EP1385	boi	100	94	176	135	0.484536	0.434084	0.0504525	0.0860124	0.769309	0.931277	0.0896627	0.764606	0.912881	0.02	0.986841	0.999905
3	P{EP}EP905	CG5646	251	214	351	233	0.460215	0.398973	0.0612425	0.0524913	0.818784	0.949633	0.0781994	0.779753	0.912881	-0.01	0.988082	0.999905
2	P{EP}l(2)34Fa[EP2418]	CG4500, NimC3	245	216	374	258	0.468547	0.408228	0.0603188	1.11601	0.290779	0.706298	1.70647	0.191444	0.51917	0.01	0.99105	0.999905
2	P{EP}Reg-5[EP1063]	Reg-5	242	167	337	182	0.408313	0.350674	0.0576386	2.10673	0.146652	0.59555	2.34654	0.125562	0.409487	0.01	0.992966	0.999905
3	P{EP}EP3291	CG32164	327	276	499	327	0.457711	0.395884	0.0618277	0.0187895	0.890972	0.969765	0.0224651	0.880857	0.957944	0.01	0.993092	0.999905
X	P{EP}EP1351		256	274	280	245	0.516981	0.466667	0.0503145	1.02256	0.311912	0.706501	1.25638	0.262337	0.608068	0.01	0.993496	0.999905
3	P{EP}CG3534[EP3669]	CG3534	391	346	503	346	0.469471	0.407538	0.0619325	0.634977	0.425535	0.779919	0.730437	0.392742	0.722284	0	0.997913	0.999905
X	P{EP}EP1583	CG1632, ND75	114	118	164	139	0.508621	0.458746	0.0498748	0.170999	0.679225	0.905965	0.326028	0.568008	0.807958	0	0.998054	0.999905
2	P{EP}EP2066	Ent1	273	198	345	196	0.420382	0.362292	0.0580901	1.08049	0.298589	0.706298	0.993883	0.318795	0.662431	0	0.998184	0.999905
3	P{EP}twf[EP3701]	twf	452	327	450	253	0.419769	0.359886	0.0598827	3.84945	0.0497624	0.331749	3.31423	0.0686826	0.311126	0	0.999905	0.999905
3	P{EP}EP3437	CG6983, Unr	390	304	352	245	0.43804	0.410385	0.0276551	0.7994	0.3713	0.747329	0.7403	0.3896	0.722284	-1.23	0.219143	0.890065
